# Supplementary material for: CuCl-Catalyzed direct C–H alkenylation of benzoxazoles with allyl halides
Source: Royal Society of Chemistry journal article supplement (doi:10.1039/c7ob01838j), 2017-01-01

*Supporting Information*

CuCl-Catalyzed Direct C-H Alkenylation of Benzoxazoles with  
Allyl Halides

Die Li, Xin-Xing Wu, Tingyu Gao, Baoguo Li,\* Shufeng Chen\*

Inner Mongolia Key Laboratory of Fine Organic Synthesis, Department of Chemistry and Chemical Engineering,  
Inner Mongolia University, Hohhot 010021, People's Republic of China

CONTENTS

|                                                                                                  |     |
|--------------------------------------------------------------------------------------------------|-----|
| 1. General information.....                                                                      | S2  |
| 2. General procedure for the CuCl-catalyzed alkenylation of benzoxazoles with allyl halides..... | S2  |
| 3. Spectral data of C2-alkenylbenzoxazole products <b>3</b> .....                                | S2  |
| 4. General procedure for the synthesis of 1,3-diene containing benzoxazoles.....                 | S7  |
| 5. Spectral data of 1,3-diene containing benzoxazoles <b>6</b> .....                             | S7  |
| 6. Reference.....                                                                                | S10 |
| 7. <sup>1</sup> H and <sup>13</sup> C NMR spectra.....                                           | S11 |

### 1. General information

All commercially available reagents were used directly without purification unless otherwise stated. All solvents were purified following standard procedures. For chromatography, 200-300 mesh silica gel (Qingdao, China) was employed.  $^1\text{H}$  and  $^{13}\text{C}$  NMR spectra were recorded at 500 and 125 MHz, respectively. Chemical shifts are reported in *ppm* using tetramethylsilane as internal standard when  $\text{CDCl}_3$  was used as solvent. IR spectra were recorded on a FT-IR instrument. The HRMS analysis was obtained on a QTOF mass spectrometer. Melting points were determined with melting points apparatus and are uncorrected.

### 2. General procedure for the CuCl-catalyzed alkenylation of benzoxazoles with allyl halides

To a solution of benzoxazole (1.0 mmol), allyl halide (1.5 mmol) and  $t\text{BuOLi}$  (3.0 mmol) in toluene (3.0 mL) was added  $\text{CuCl}$  (0.1 mmol) under a  $\text{N}_2$  atmosphere. The resulting mixture was heated at  $110\text{ }^\circ\text{C}$  for the indicated time. After completion of the reaction, the mixture was cooled to room temperature. The solvent was removed in a vacuum, and the resulting residue was purified on a silica gel column (Petroleum ether/EtOAc = 50:1) to provide the desired products **3**.

### 3. Spectral data of C2-alkenylbenzoxazole products **3**

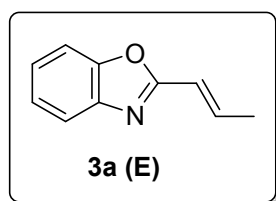

*(E)*-2-(Prop-1-en-1-yl)benzo[d]oxazole (**3a**) (*E*). Pale yellow oil ; 111 mg, 70% yield; (recrystallized from petroleum ether and ethyl acetate at room temperature); IR (KBr) 3738, 3673, 2929, 2855, 2372, 1512, 1015, 821  $\text{cm}^{-1}$ ;  $^1\text{H}$  NMR (500 MHz,  $\text{CDCl}_3$ )  $\delta$  1.98 (dd,  $J_1 = 1.5\text{ Hz}$ ,  $J_2 = 7.0\text{ Hz}$ , 3H), 6.44 (dd,  $J_1 = 1.5\text{ Hz}$ ,  $J_2 = 15.5\text{ Hz}$ , 1H), 6.97-7.04 (m, 1H), 7.26-7.29 (m, 2H), 7.44-7.45 (m, 1H), 7.65-7.67 (m, 1H);  $^{13}\text{C}$  NMR (125 MHz,  $\text{CDCl}_3$ )  $\delta$  18.7, 110.2, 118.2, 119.8, 124.3, 124.8, 139.0, 141.9, 150.3, 162.4; HRMS (ESI) calcd for  $\text{C}_{10}\text{H}_{10}\text{NO}$  [ $\text{M}+\text{H}$ ] $^+$  160.0757, found 160.0762.

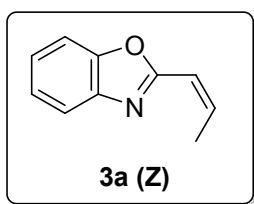

*(Z)*-2-(Prop-1-en-1-yl)benzo[d]oxazole (**3a**) (*Z*). Pale yellow oil; 31 mg, 20% yield; (recrystallized from petroleum ether and ethyl acetate at room temperature); IR (KBr) 3740, 3663, 2926, 2852, 2367, 1512, 1265, 1021, 809, 695  $\text{cm}^{-1}$ ;  $^1\text{H}$  NMR (500 MHz,  $\text{CDCl}_3$ )  $\delta$  2.34 (dd,  $J_1 = 1.5$  Hz,  $J_2 = 7.0$  Hz, 3H), 6.34-6.39 (m, 1H), 6.43 (dd,  $J_1 = 1.0$  Hz,  $J_2 = 11.5$  Hz, 1H), 7.31-7.33 (m, 2H), 7.50-7.52 (m, 1H), 7.72-7.73 (m, 1H);  $^{13}\text{C}$  NMR (125 MHz,  $\text{CDCl}_3$ )  $\delta$  16.1, 110.4, 116.2, 119.9, 124.4, 125.0, 139.6, 141.7, 149.9, 162.6.

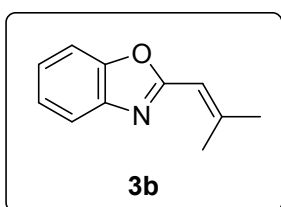

2-(2-Methylprop-1-en-1-yl)benzo[d]oxazole (**3b**)<sup>1</sup>. White solid; 156 mg, 90% yield; m.p: 42-45  $^{\circ}\text{C}$ ; (recrystallized from petroleum ether and ethyl acetate at room temperature); IR (KBr) 3440, 3055, 2923, 1639, 1536, 1454, 1242, 1006, 968, 924, 850, 744, 615  $\text{cm}^{-1}$ ;  $^1\text{H}$  NMR (500 MHz,  $\text{CDCl}_3$ )  $\delta$  1.98 (s, 3H), 2.33 (s, 3H), 6.22 (s, 1H), 7.26-7.29 (m, 2H), 7.46-7.47 (m, 1H), 7.68-7.70 (m, 1H);  $^{13}\text{C}$  NMR (125 MHz,  $\text{CDCl}_3$ )  $\delta$  21.0, 27.6, 110.1, 111.9, 119.6, 124.1, 124.4, 142.0, 149.7, 150.5, 162.8.

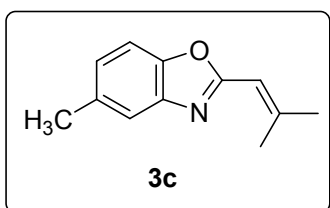

5-Methyl-2-(2-methylprop-1-en-1-yl)benzo[d]oxazole (**3c**). Pale yellow solid; 159 mg, 84% yield; m.p: 50-53  $^{\circ}\text{C}$ ; (recrystallized from petroleum ether and ethyl acetate at room temperature); IR (KBr) 3438, 2920, 1648, 1533, 1451, 1348, 1242, 1006, 965, 850, 741  $\text{cm}^{-1}$ ;  $^1\text{H}$  NMR (500 MHz,  $\text{CDCl}_3$ )  $\delta$  1.99 (s, 3H), 2.32 (s, 3H), 2.42 (s, 3H), 6.21 (s, 1H), 7.05 (d,  $J = 8.5$  Hz, 1H), 7.31 (d,  $J = 8.0$  Hz, 1H), 7.46 (s, 1H);  $^{13}\text{C}$  NMR (125 MHz,  $\text{CDCl}_3$ )  $\delta$  21.0, 27.6, 110.1, 111.6, 119.9, 124.1, 124.4, 124.5, 142.0, 149.7, 150.5, 162.8; HRMS (ESI) calcd for  $\text{C}_{12}\text{H}_{14}\text{NO}$   $[\text{M}+\text{H}]^+$  188.1070, found 188.1067. Anal. Calcd for  $\text{C}_{12}\text{H}_{13}\text{NO}$ : C, 76.98; H, 7.00; N, 7.48. Found: C, 76.77; H, 7.13; N, 7.30.

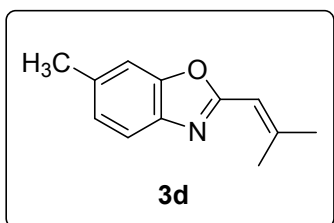

*6-Methyl-2-(2-methylprop-1-en-1-yl)benzo[d]oxazole (3d).*

Pale yellow solid; 167 mg, 89% yield; m.p: 54-56 °C; (recrystallized from petroleum ether and ethyl acetate at room temperature); IR (KBr) 3435, 3055, 2931, 1645, 1536, 1454, 1345, 1242, 1006, 965, 853, 744 cm<sup>-1</sup>; <sup>1</sup>H NMR (500 MHz, CDCl<sub>3</sub>) δ 2.00 (s, 3H), 2.33 (s, 3H), 2.44 (s, 3H), 6.22 (s, 1H), 7.08 (d, *J* = 8.5 Hz, 1H), 7.25 (s, 1H), 7.54 (d, *J* = 8.0 Hz, 1H); <sup>13</sup>C NMR (125 MHz, CDCl<sub>3</sub>) δ 20.9, 21.7, 27.6, 110.38, 112.0, 118.9, 125.3, 134.8, 139.8, 149.8, 150.0, 162.4; HRMS (ESI) calcd for C<sub>12</sub>H<sub>14</sub>NO [M+H]<sup>+</sup> 188.1070, found 188.1065. Anal. Calcd for C<sub>12</sub>H<sub>13</sub>NO: C, 76.98; H, 7.00; N, 7.48. Found: C, 76.77; H, 7.27; N, 7.35.

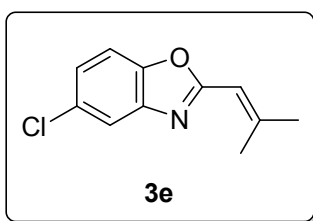

*5-Chloro-2-(2-methylprop-1-en-1-yl)benzo[d]oxazole (3e).*

Pale yellow solid; 162 mg, 78% yield; m.p: 59-63 °C; (recrystallized from petroleum ether and ethyl acetate at room temperature); IR (KBr) 3432, 3055, 2914, 1645, 1536, 1451, 1345, 1242, 1000, 965, 856, 747, 624 cm<sup>-1</sup>; <sup>1</sup>H NMR (500 MHz, CDCl<sub>3</sub>) δ 2.01(s, 3H), 2.32 (s, 3H), 6.19 (s, 1H), 7.20 (dd, *J*<sub>1</sub> = 2.0 Hz, *J*<sub>2</sub> = 8.5 Hz, 1H), 7.33 (d, *J* = 8.5 Hz, 1H), 7.62 (d, *J* = 2.0 Hz, 1H); <sup>13</sup>C NMR (125 MHz, CDCl<sub>3</sub>) δ 21.0, 27.7, 110.8, 111.5, 119.4, 124.6, 129.5, 143.1, 148.2, 151.9, 164.0; HRMS (ESI) calcd for C<sub>11</sub>H<sub>11</sub>ClNO [M+H]<sup>+</sup> 208.0524, found 208.0526. Anal. Calcd for C<sub>11</sub>H<sub>10</sub>ClNO: C, 63.62; H, 4.85; N, 6.75. Found: C, 63.66; H, 5.09; N, 6.41.

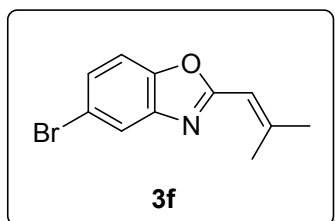

*5-Bromo-2-(2-methylprop-1-en-1-yl)benzo[d]oxazole (3f).*

Pale yellow solid; 201 mg, 80% yield; m.p: 62-65 °C; (recrystallized from petroleum ether and ethyl acetate at room temperature); IR (KBr) 3090, 1804, 1657, 1539, 1452, 1249, 1141, 1045, 953 cm<sup>-1</sup>; <sup>1</sup>H NMR (500 MHz, CDCl<sub>3</sub>) δ 2.04 (d, *J* = 1.0 Hz, 3H), 2.34 (s, 1H), 6.21 (t, *J* = 1.0 Hz, 1H), 7.32 (d, *J* = 8.5 Hz, 1H), 7.37 (dd, *J*<sub>1</sub> = 2.0 Hz, *J*<sub>2</sub> = 8.5 Hz, 1H), 7.80 (d, *J* = 2.0 Hz, 1H); <sup>13</sup>C NMR (125 MHz, CDCl<sub>3</sub>) δ 21.1,

27.8, 111.4, 111.5, 116.8, 122.5, 127.4, 143.6, 148.7, 152.1, 163.9; HRMS (ESI) calcd for C<sub>11</sub>H<sub>10</sub>BrNONa [M+Na]<sup>+</sup> 273.9837, found 273.9828.

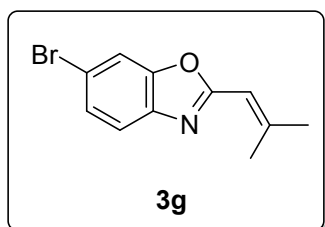

*6-Bromo-2-(2-methylprop-1-en-1-yl)benzo[d]oxazole (3g).*

Pale yellow solid; 218 mg, 87% yield; m.p: 77-79 °C; (recrystallized from petroleum ether and ethyl acetate at room temperature); IR (KBr) 3099, 2979, 2911, 1884,

1654, 1539, 1427, 1257, 1133, 1045, 945, 906, 839, 806, 676, 588, 424 cm<sup>-1</sup>; <sup>1</sup>H NMR (500 MHz, CDCl<sub>3</sub>) δ 2.02 (s, 3H), 2.32 (s, 3H), 6.19 (s, 1H), 7.39 (dd, *J*<sub>1</sub> = 1.5 Hz, *J*<sub>2</sub> = 8.5, 1H), 7.51 (d, *J* = 8.5 Hz, 1H), 7.60 (d, *J* = 1.5 Hz, 1H); <sup>13</sup>C NMR (125 MHz, CDCl<sub>3</sub>) δ 21.1, 27.7, 111.5, 113.7, 117.2, 120.5, 127.5, 141.2, 150.2, 151.8, 163.2; HRMS (ESI) calcd for C<sub>11</sub>H<sub>11</sub>BrNO [M+H]<sup>+</sup> 252.0019, found 252.0016.

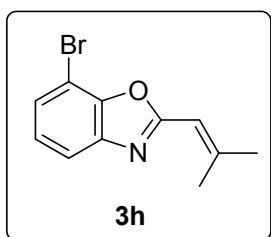

*7-Bromo-2-(2-methylprop-1-en-1-yl)benzo[d]oxazole (3h).* Pale

yellow solid; 193 mg, 77% yield; m.p: 57-59 °C; (recrystallized from petroleum ether and ethyl acetate at room temperature); IR (KBr) 3079, 2917, 1919, 1654, 1548, 1421, 1348, 1262, 1215, 1127, 1068, 959, 836, 786, 736, 624 cm<sup>-1</sup>; <sup>1</sup>H NMR (500 MHz,

CDCl<sub>3</sub>) δ 2.04 (s, 3H), 2.36 (s, 3H), 6.27 (s, 1H), 7.15 (t, *J* = 8.0 Hz, 1H), 7.39 (d, *J* = 8.0 Hz, 1H), 7.59 (d, *J* = 8.0 Hz, 1H); <sup>13</sup>C NMR (125 MHz, CDCl<sub>3</sub>) δ 21.1, 27.8, 102.1, 111.4, 118.6, 125.3, 127.5, 142.7, 147.9, 152.3, 162.9; HRMS (ESI) calcd for C<sub>11</sub>H<sub>11</sub>BrNO [M+H]<sup>+</sup> 252.0019, found 252.0024. Anal. Calcd for C<sub>11</sub>H<sub>10</sub>BrNO: C, 52.41; H, 4.00; N, 5.56. Found: C, 52.56; H, 4.18; N, 5.40.

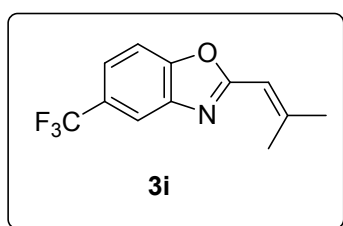

*2-(2-Methylprop-1-en-1-yl)-5-*

*(trifluoromethyl)benzo[d]oxazole (3i).* Pale yellow solid;

176 mg, 73% yield; m.p: 56-58 °C; (recrystallized from petroleum ether and ethyl acetate at room temperature);

IR (KBr) 3058, 2920, 1657, 1524, 1442, 1321, 1168, 1124, 1045, 933, 812, 656cm<sup>-1</sup>;

$^1\text{H}$  NMR (500 MHz,  $\text{CDCl}_3$ )  $\delta$  2.05 (d,  $J = 1.0$  Hz, 3H), 2.36 (d,  $J = 0.5$  Hz, 3H), 6.24-6.25 (m, 1H), 7.53 (t,  $J = 0.8$  Hz, 2H), 7.95 (s, 1H);  $^{13}\text{C}$  NMR (125 MHz,  $\text{CDCl}_3$ )  $\delta$  21.1, 27.7, 110.5, 111.3, 117.1, 117.1, 121.6, 121.6, 142.2, 151.4, 152.9, 164.4; HRMS (ESI) calcd for  $\text{C}_{12}\text{H}_{11}\text{F}_3\text{NO}$   $[\text{M}+\text{H}]^+$  242.0787, found 242.0785.

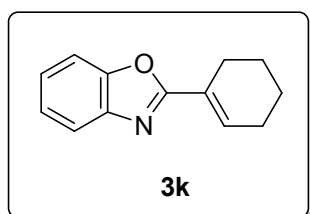

*2-(Cyclohex-1-en-1-yl)benzo[d]oxazole (3k)*. Pale yellow solid; 159 mg, 80% yield; m.p: 29-31 °C; (recrystallized from petroleum ether and ethyl acetate at room temperature); IR (KBr) 3432, 3055, 2923, 1639, 1533, 1454, 1242, 1006, 955, 847, 747, 623  $\text{cm}^{-1}$ ;  $^1\text{H}$  NMR (500 MHz,  $\text{CDCl}_3$ )  $\delta$  1.67-1.70 (m, 2H), 1.77-1.80 (m, 2H), 2.28 (dd,  $J_1 = 2.5\text{Hz}$ ,  $J_2 = 6.5$  Hz, 2H), 2.59 (t,  $J = 3.0$  Hz, 2H), 7.05-7.06 (m, 1H), 7.26-7.28 (m, 2H), 7.44-7.46 (m, 1H), 7.68-7.70 (m, 1H);  $^{13}\text{C}$  NMR (125 MHz,  $\text{CDCl}_3$ )  $\delta$  21.7, 22.1, 24.7, 25.8, 110.1, 120.0, 124.0, 124.1, 124.7, 135.4, 142.0, 150.3, 164.1; HRMS (ESI) calcd for  $\text{C}_{13}\text{H}_{14}\text{NO}$   $[\text{M}+\text{H}]^+$  200.1069, found 200.1076.

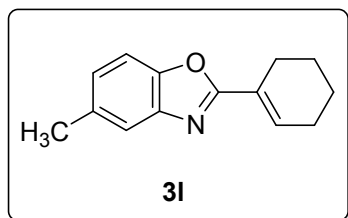

*2-(Cyclohex-1-en-1-yl)-5-methylbenzo[d]oxazole (3l)*. White solid; 149 mg, 70% yield; m.p: 50-53 °C; (recrystallized from petroleum ether and ethyl acetate at room temperature); IR (KBr) 3426, 2923, 1651, 1542, 1460, 1345, 1236, 1101, 1003, 968, 850, 739  $\text{cm}^{-1}$ ;  $^1\text{H}$  NMR (500 MHz,  $\text{CDCl}_3$ )  $\delta$  1.67-1.71 (m, 2H), 1.76-1.80 (m, 2H), 2.28-2.30 (m, 2H), 2.43 (s, 3H), 2.59 (dd,  $J_1 = 5.5$  Hz,  $J_2 = 7.5$  Hz, 2H), 7.02-7.07 (m, 2H), 7.31 (d,  $J = 8.5$  Hz, 1H), 7.46 (s, 1H);  $^{13}\text{C}$  NMR (125 MHz,  $\text{CDCl}_3$ )  $\delta$  21.5, 21.9, 22.1, 24.7, 25.8, 109.5, 119.7, 125.7, 126.4, 133.8, 135.0, 142.1, 148.5, 164.3; HRMS (ESI) calcd for  $\text{C}_{14}\text{H}_{16}\text{NO}$   $[\text{M}+\text{H}]^+$  214.1226, found 214.1231.

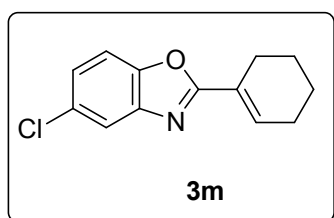

*5-Chloro-2-(cyclohex-1-en-1-yl)benzo[d]oxazole (3m)*.

White solid; 175 mg, 75% yield; m.p: 60-62 °C;

(recrystallized from petroleum ether and ethyl acetate at room temperature); IR (KBr) 3435, 3061, 2923, 1539, 1448, 1236, 1003, 968, 855, 736, 618 $\text{cm}^{-1}$ ;  $^1\text{H}$  NMR (500 MHz,  $\text{CDCl}_3$ )  $\delta$  1.67-1.70 (m, 2H), 1.77-1.80 (m, 2H), 2.28 (dd,  $J_1 = 2.5$  Hz,  $J_2 = 6.5$  Hz, 2H), 2.59 (t,  $J = 3.0$  Hz, 2H), 7.05-7.06 (t,  $J = 1.8$  Hz, 1H), 7.25-7.28 (m, 1H), 7.44-7.46 (m, 1H), 7.68-7.70 (m, 1H);  $^{13}\text{C}$  NMR (125 MHz,  $\text{CDCl}_3$ )  $\delta$  21.8, 22.0, 24.6, 25.9, 110.9, 119.7, 124.9, 126.1, 129.5, 136.5, 143.1, 148.9, 165.4; HRMS (ESI) calcd for  $\text{C}_{13}\text{H}_{13}\text{NOCl}$   $[\text{M}+\text{H}]^+$  234.0680, found 234.0678.

#### 4. General procedure for the synthesis of 1,3-diene containing benzoxazoles

To a solution of benzoxazole (1.5 mmol), 1,4-dibromobut-2-ene (1.0 mmol) and  $t\text{BuOLi}$  (3.0 mmol) in toluene (3.0 mL) was added  $\text{CuCl}$  (0.1 mmol) under a  $\text{N}_2$  atmosphere. The resulting mixture was heated at 50  $^\circ\text{C}$  for the indicated time. After completion of the reaction, the mixture was cooled to room temperature. The solvent was removed in a vacuum, and the resulting residue was purified on a silica gel column (Petroleum ether/EtOAc = 50:1) to provide the desired products **6**.

#### 5. Spectral data of 1,3-diene containing benzoxazoles **6**

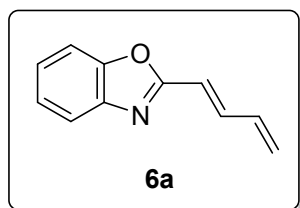

*(E)*-2-(Buta-1,3-dien-1-yl)benzo[d]oxazole (**6a**). White solid ; 128 mg, 75% yield; m.p: 32-34 $^\circ\text{C}$ ; (recrystallized from petroleum ether and ethyl acetate at room temperature) IR (KBr) 2926, 1527, 1451, 1242, 1000, 912, 850, 739  $\text{cm}^{-1}$ ;  $^1\text{H}$  NMR (500 MHz,  $\text{CDCl}_3$ )  $\delta$  5.45 (d,  $J = 10.0$  Hz, 1H), 5.60 (d,  $J = 16.5$  Hz, 1H), 6.52-6.60 (m, 2H), 7.29-7.31 (m, 2H), 7.39 (dd,  $J_1 = 11.0$  Hz,  $J_2 = 15.5$  Hz, 1H), 7.46-7.50 (m, 1H), 7.68-7.70 (m, 1H);  $^{13}\text{C}$  NMR (125 MHz,  $\text{CDCl}_3$ )  $\delta$  110.3, 117.9, 120.0, 123.8, 124.5, 125.2, 135.5, 140.0, 142.2, 150.4, 162.5; HRMS (ESI) calcd for  $\text{C}_{11}\text{H}_{10}\text{NO}$   $[\text{M}+\text{H}]^+$  172.0757, found 172.0752.

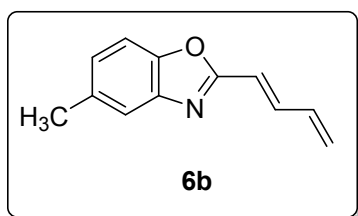

*(E)*-2-(buta-1,3-dien-1-yl)-5-methylbenzo[d]oxazole (**6b**).

White solid; 139 mg, 75% yield; m.p: 60-62 °C; (recrystallized from petroleum ether and ethyl acetate at room temperature); IR (KBr) 3014, 1845, 1595, 1519, 1257, 1186, 1003, 924, 856, 800 cm<sup>-1</sup>; <sup>1</sup>H NMR (500 MHz, CDCl<sub>3</sub>) δ 2.46 (s, 3H), 5.46 (d, *J* = 10.0 Hz, 1H), 5.61 (d, *J* = 17.0 Hz, 1H), 6.51-6.61 (m, 2H), 7.12 (dd, *J*<sub>1</sub> = 1.0 Hz, *J*<sub>2</sub> = 8.5 Hz, 1H), 7.35-7.40 (m, 2H), 7.47 (s, 1H); <sup>13</sup>C NMR (125 MHz, CDCl<sub>3</sub>) δ 21.5, 109.7, 118.0, 119.8, 123.6, 126.4, 134.3, 135.6, 139.6, 142.3, 148.6, 162.6; HRMS (ESI) calcd for C<sub>12</sub>H<sub>12</sub>NO [M+H]<sup>+</sup> 186.0913, found 186.0912.

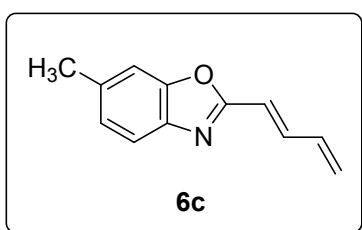

*(E)*-2-(Buta-1,3-dien-1-yl)-6-methylbenzo[d]oxazole

(6c). White solid; 135 mg, 73% yield; m.p: 59-62 °C; (recrystallized from petroleum ether and ethyl acetate at room temperature); IR (KBr) 3431, 2917, 1610, 1486,

1239, 1112, 965, 812, 594 cm<sup>-1</sup>; <sup>1</sup>H NMR (500 MHz, CDCl<sub>3</sub>) δ 2.48 (s, 3H), 5.45 (d, *J* = 10.0 Hz, 1H), 5.60 (d, *J* = 17.0 Hz, 1H), 6.51-6.61 (m, 2H), 7.13 (d, *J* = 8.5 Hz, 1H), 7.29 (s, 1H), 7.36 (dd, *J*<sub>1</sub> = 11.0 Hz, *J*<sub>2</sub> = 16.0 Hz, 1H), 7.55 (d, *J* = 8.5 Hz, 1H); <sup>13</sup>C NMR (125 MHz, CDCl<sub>3</sub>) 21.8, 110.5, 118.0, 119.2, 123.4, 125.7, 135.6, 135.8, 139.4, 140.0, 150.7, 164.9; HRMS (ESI) calcd for C<sub>12</sub>H<sub>12</sub>NO [M+H]<sup>+</sup> 186.0913, found 186.0900.

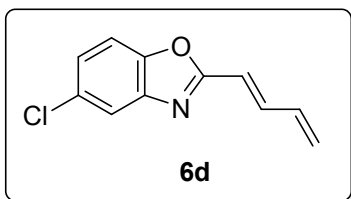

*(E)*-2-(Buta-1,3-dien-1-yl)-5-chlorobenzo[d]oxazole (6d).

White solid; 164 mg, 80% yield; m.p: 58-60 °C; (recrystallized from petroleum ether and ethyl acetate at room temperature); IR (KBr) 3014, 1586, 1524, 1445,

1257, 1012, 915, 906, 853, 792, 697, 591 cm<sup>-1</sup>; <sup>1</sup>H NMR (500 MHz, CDCl<sub>3</sub>) δ 5.49 (d, *J* = 10.0 Hz, 1H), 5.62 (d, *J* = 17.0 Hz, 1H), 6.47-6.60 (m, 2H), 7.25-7.28 (m, 1H), 7.35-7.40 (m, 2H), 7.64 (d, *J* = 2.0 Hz, 1H); <sup>13</sup>C NMR (125 MHz, CDCl<sub>3</sub>) δ 111.0, 117.4, 119.8, 124.4, 125.4, 129.9, 135.4, 140.7, 143.3, 148.9, 163.7; HRMS (ESI) calcd for C<sub>11</sub>H<sub>9</sub>ClNO [M+H]<sup>+</sup> 206.0211, found 206.0216.



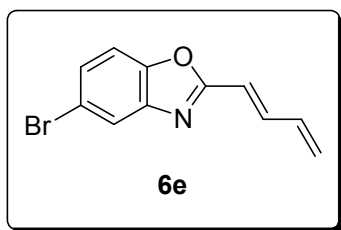

*(E)*-2-(Buta-1,3-dien-2-yl)-5-bromobenzo[d]oxazole (**6e**).

White solid; 174 mg, 70% yield; m.p: 71-73 °C; (recrystallized from petroleum ether and ethyl acetate at room temperature); IR (KBr) 3087, 1845, 1583, 1519, 1445, 1251, 1165, 1000, 927, 862, 797, 680, 583 cm<sup>-1</sup>; <sup>1</sup>H NMR (500 MHz, CDCl<sub>3</sub>) δ 5.49 (d, *J* = 10.0 Hz, 1H), 5.62 (d, *J* = 17.0 Hz, 1H), 6.48-6.60 (m, 2H), 7.32-7.41 (m, 3H), 7.79 (d, *J* = 2.0 Hz, 1H); <sup>13</sup>C NMR (125 MHz, CDCl<sub>3</sub>) δ 111.5, 117.2, 117.3, 122.8, 124.5, 128.1, 135.4, 140.8, 143.7, 149.4, 163.5; HRMS (ESI) calcd for C<sub>11</sub>H<sub>9</sub>NOBr [M+H]<sup>+</sup> 249.9862, found 249.9867.

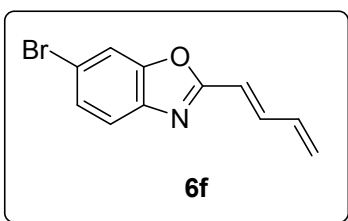

*(E)*-6-Bromo-2-(buta-1,3-dien-1-yl)benzo[d]oxazole (**6f**).

Pale yellow solid; 189mg, 76% yield; m.p: 70-72 °C; (recrystallized from petroleum ether and ethyl acetate at room temperature); IR (KBr) 3017, 1604, 1457, 1262, 1000, 918, 800, 580 cm<sup>-1</sup>; <sup>1</sup>H NMR (500 MHz, CDCl<sub>3</sub>) δ 5.51 (d, *J* = 10.0 Hz, 1H), 5.64 (d, *J* = 17.0 Hz, 1H), 6.52 (d, *J* = 15.5 Hz, 1H), 6.55-6.62 (m, 1H), 7.39 (t, *J* = 8.0 Hz, 1H), 7.44 (dd, *J*<sub>1</sub> = 1.5 Hz, *J*<sub>2</sub> = 8.5 Hz, 1H), 7.55 (d, *J* = 8.5 Hz, 1H), 7.66 (d, *J* = 2.0 Hz, 1H); <sup>13</sup>C NMR (125 MHz, CDCl<sub>3</sub>) δ 113.9, 117.4, 118.1, 120.8, 124.4, 128.0, 135.4, 140.6, 141.4, 151.0, 163.0; HRMS (ESI) calcd for C<sub>11</sub>H<sub>9</sub>BrNO [M+H]<sup>+</sup> 249.9862, found 249.9869.

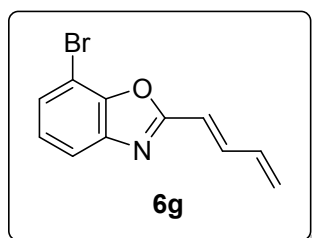

*(E)*-7-Bromo-2-(buta-1,3-dien-1-yl)benzo[d]oxazole (**6g**).

Pale yellow oil; 199 mg, 80% yield; (recrystallized from petroleum ether and ethyl acetate at room temperature); IR (KBr) 2923, 1607, 1524, 1474, 1416, 1265, 1218, 1071, 1006, 909, 776, 733, 730, 621, 456 cm<sup>-1</sup>; <sup>1</sup>H NMR (500 MHz, CDCl<sub>3</sub>) δ 5.52 (d, *J* = 10.0 Hz, 1H), 5.68 (d, *J* = 16.5 Hz, 1H), 6.54-6.63 (m, 2H), 7.21 (t, *J* = 7.75 Hz, 1H), 7.46-7.51 (m, 2H), 7.62 (dd, *J*<sub>1</sub> = 0.5 Hz, *J*<sub>2</sub> = 8.0 Hz, 1H); <sup>13</sup>C NMR (125 MHz, CDCl<sub>3</sub>) δ 102.3, 117.2, 118.9, 124.6, 125.7, 128.3, 135.4,

141.1, 142.9, 148.6, 162.6; HRMS (ESI) calcd for C<sub>11</sub>H<sub>8</sub>BrNONa [M+Na]<sup>+</sup> 271.9681, found 271.9705.

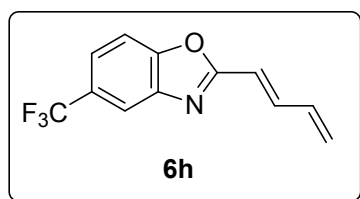

(*E*)-2-(Buta-1,3-dien-1-yl)-5-

(trifluoromethyl)benzo[d]oxazole (*6h*). Colorless oil; 96 mg, 40% yield; (recrystallized from petroleum ether and ethyl acetate at room temperature); IR (KBr)

2958, 2926, 2855, 1725, 1460, 1380, 1324, 1257, 1124, 800 cm<sup>-1</sup>; <sup>1</sup>H NMR (500 MHz, CDCl<sub>3</sub>) δ 5.52-5.54 (d, *J* = 10.0 Hz, 1H), 5.65-5.68 (d, *J* = 17.0 Hz, 1H), 6.54-6.64 (m, 2H), 7.42-7.48 (dd, *J*<sub>1</sub> = 11.0 Hz, *J*<sub>2</sub> = 15.5 Hz, 1H), 7.57-7.61 (m, 2H), 7.96 (s, 1H); <sup>13</sup>C NMR (125 MHz, CDCl<sub>3</sub>) δ 110.7, 117.2, 117.5, 117.6, 122.4 (q, *J*<sub>C-F</sub> = 265 Hz), 124.8, 127.8, 135.3, 141.3, 142.3, 152.1, 164.1; HRMS (ESI) calcd for C<sub>12</sub>H<sub>9</sub>F<sub>3</sub>NO [M+H]<sup>+</sup> 240.0631, found 240.0636.

## 6. Reference

(1) Xie, W.; Chang, S. *Angew. Chem., Int. Ed.* **2016**, *55*, 1876.

## 7. $^1\text{H}$ and $^{13}\text{C}$ NMR spectra

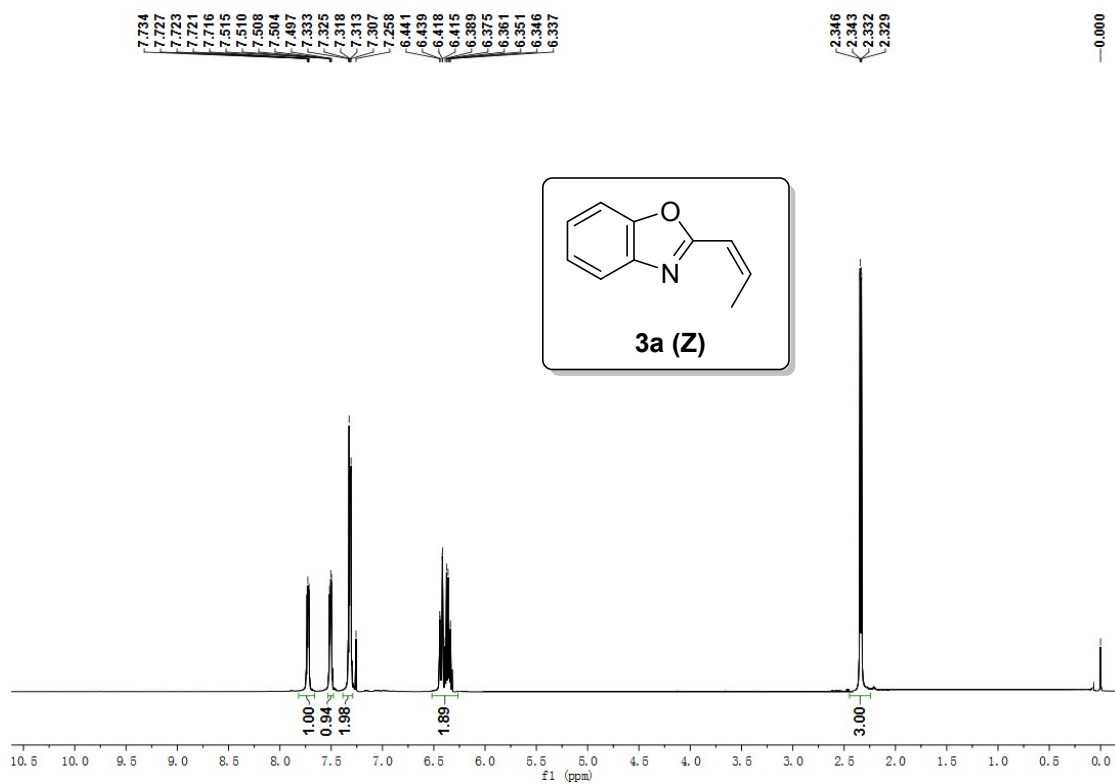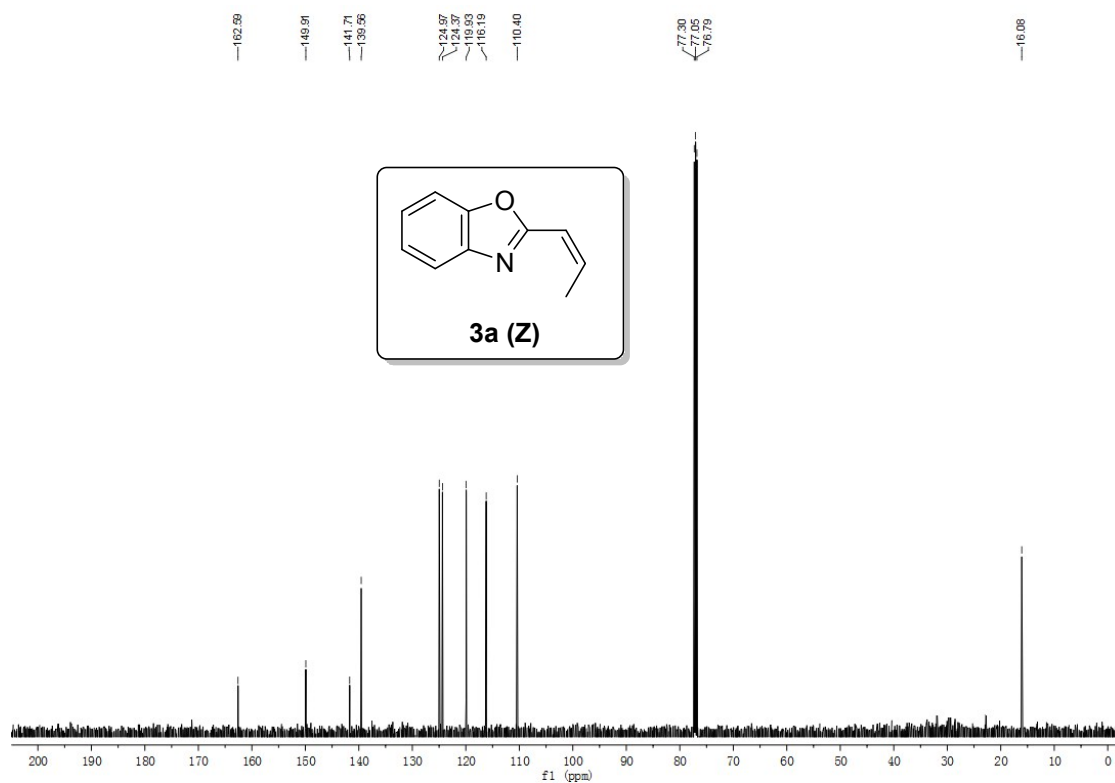

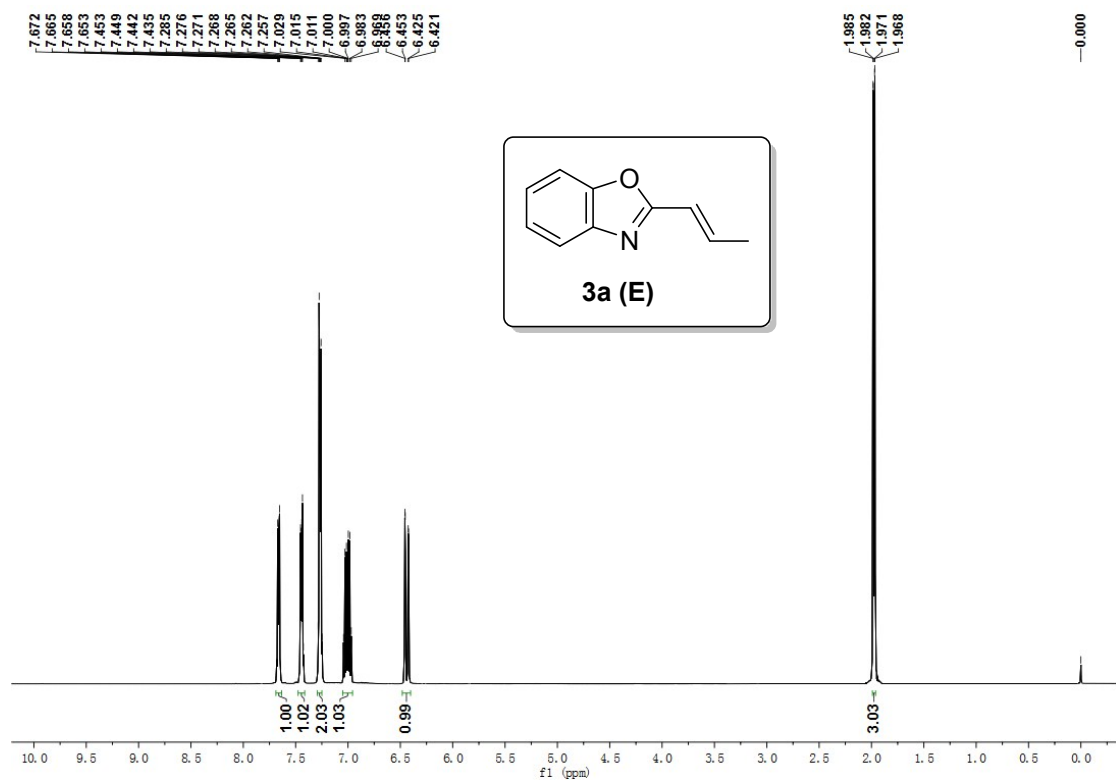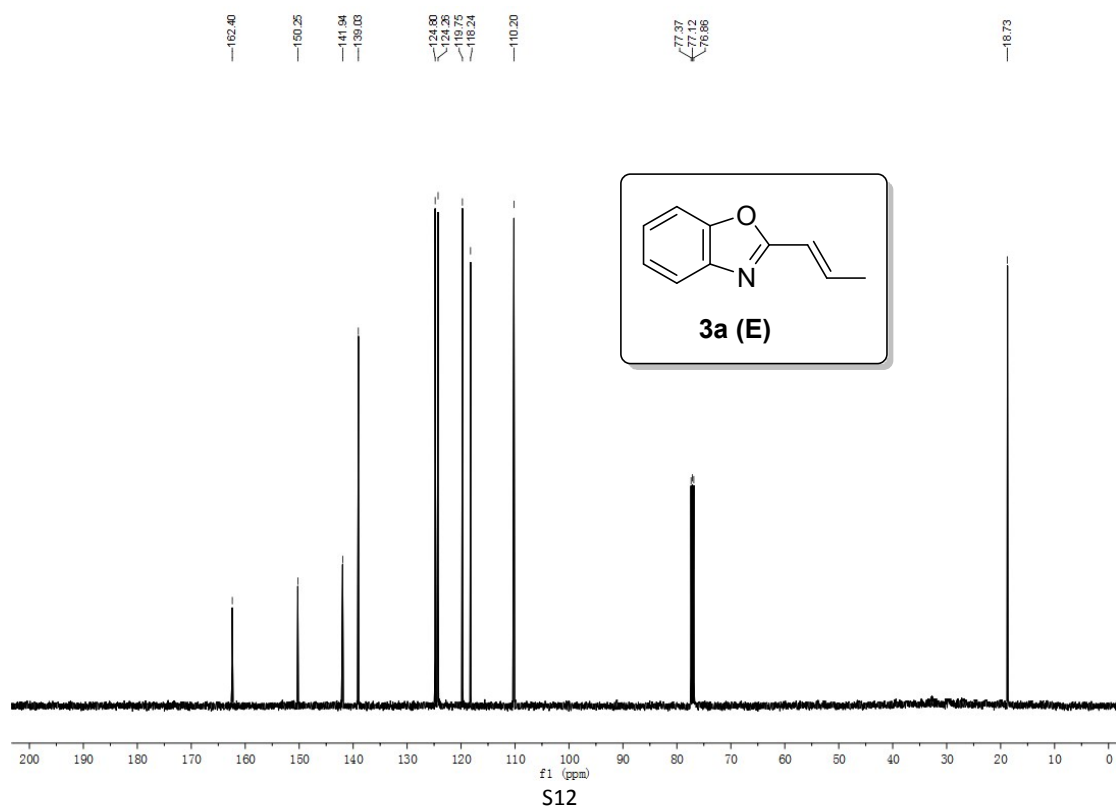

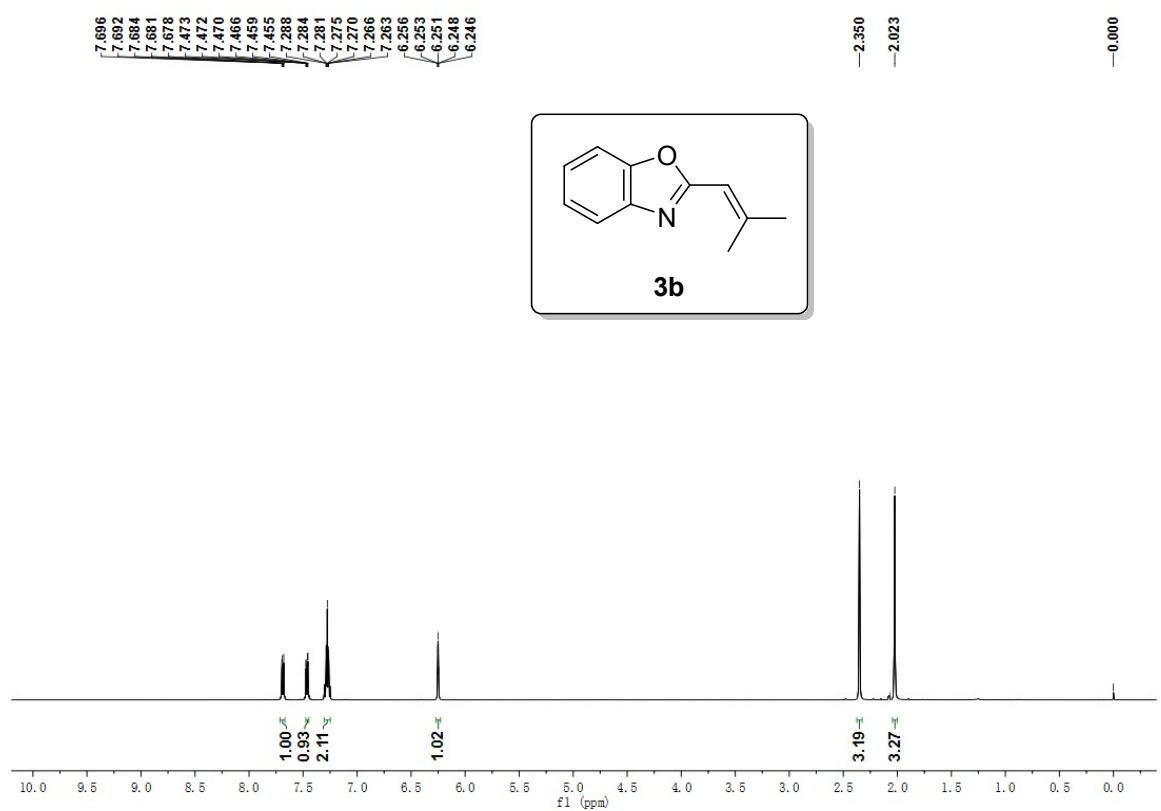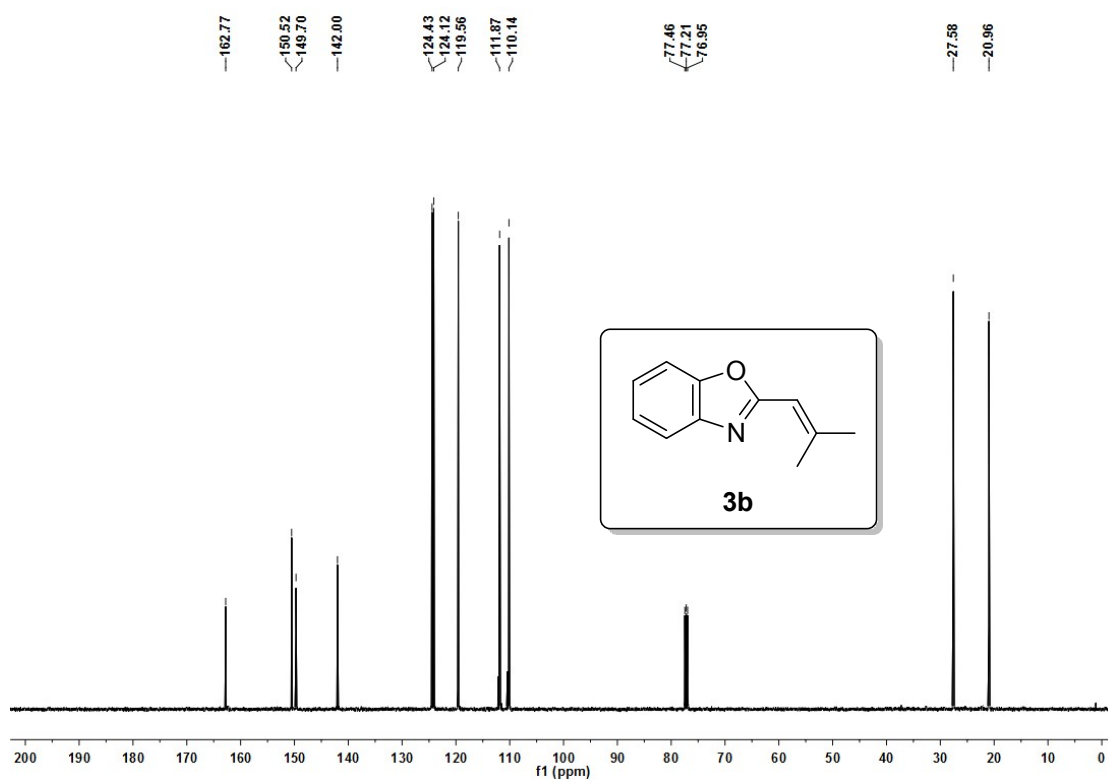

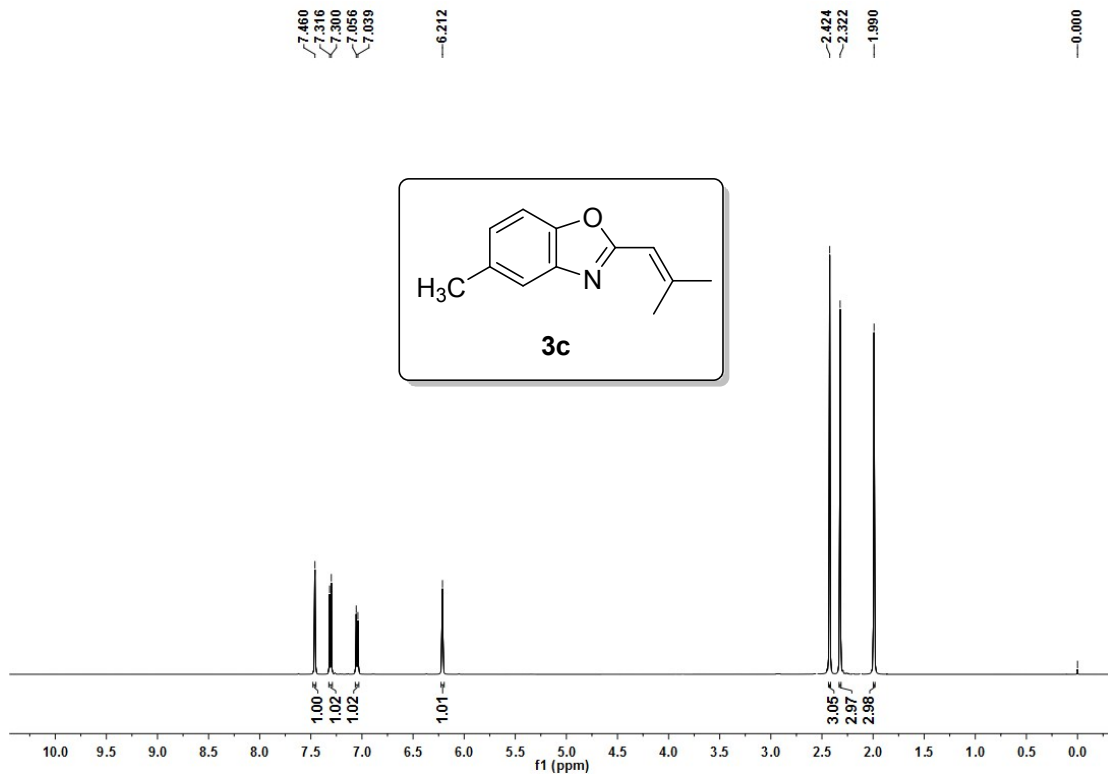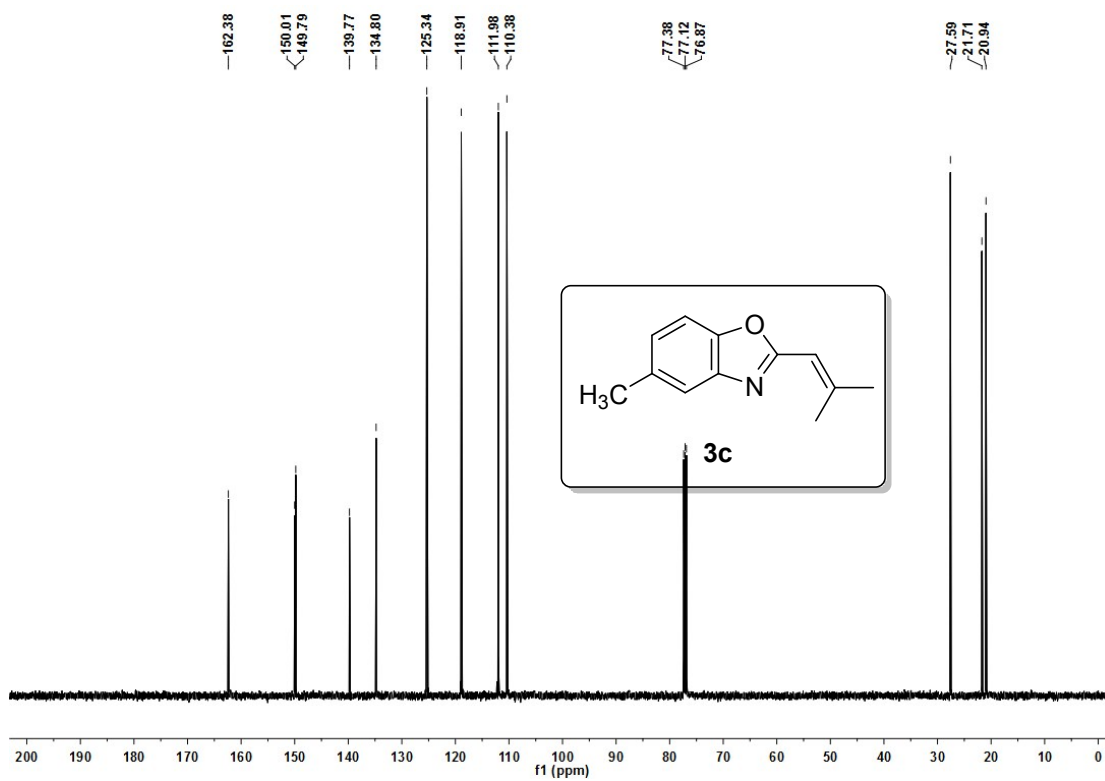

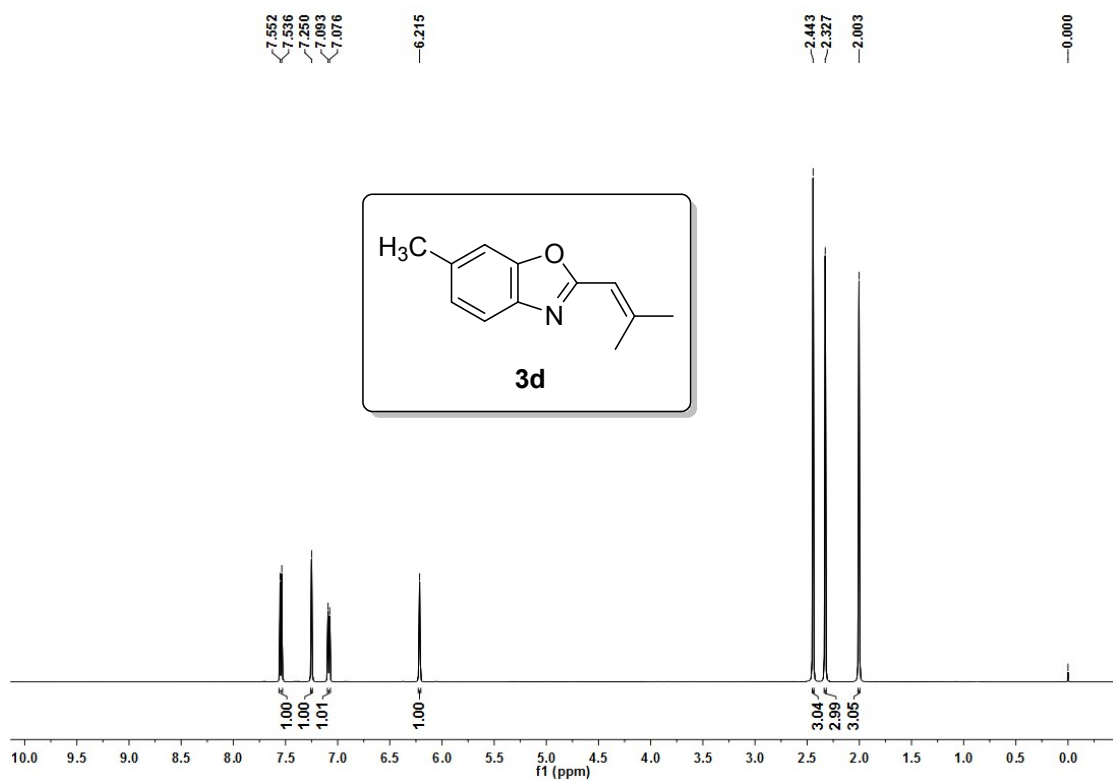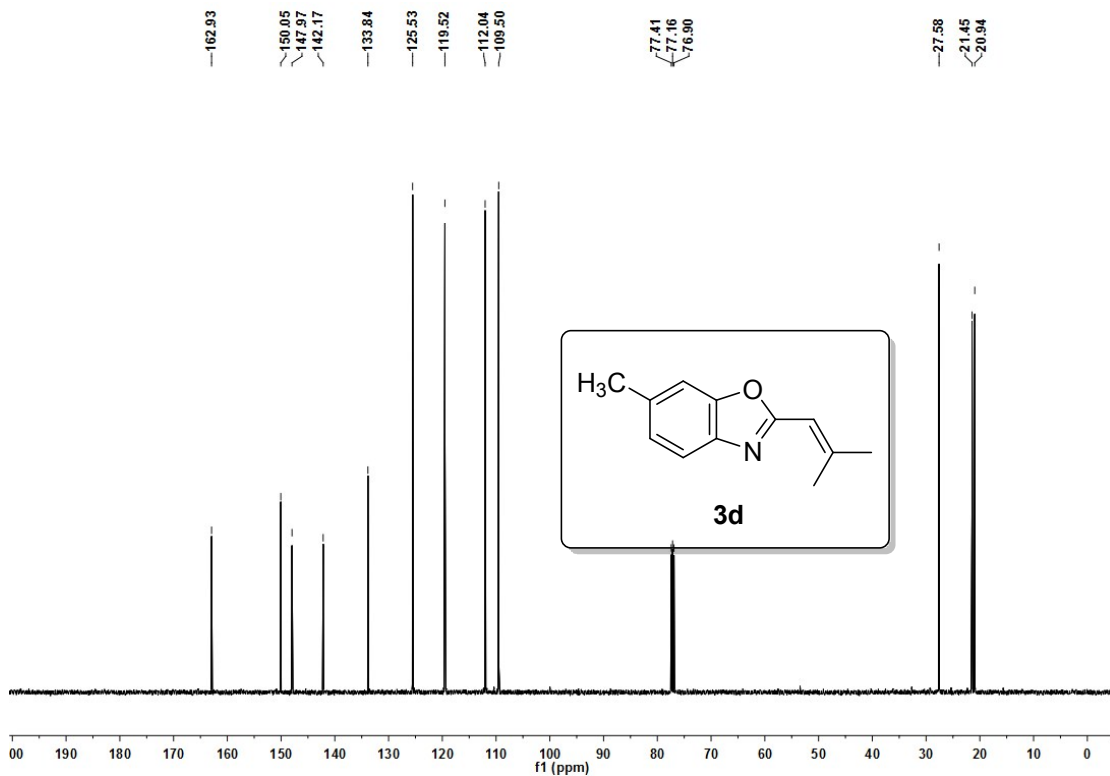

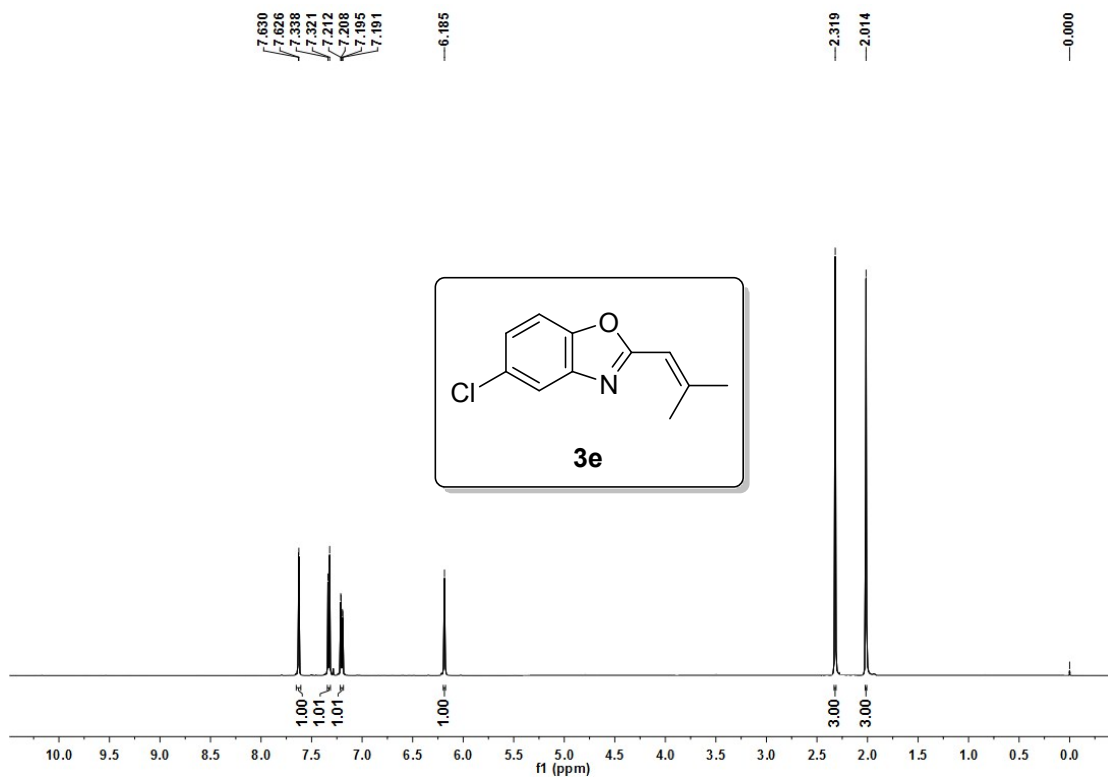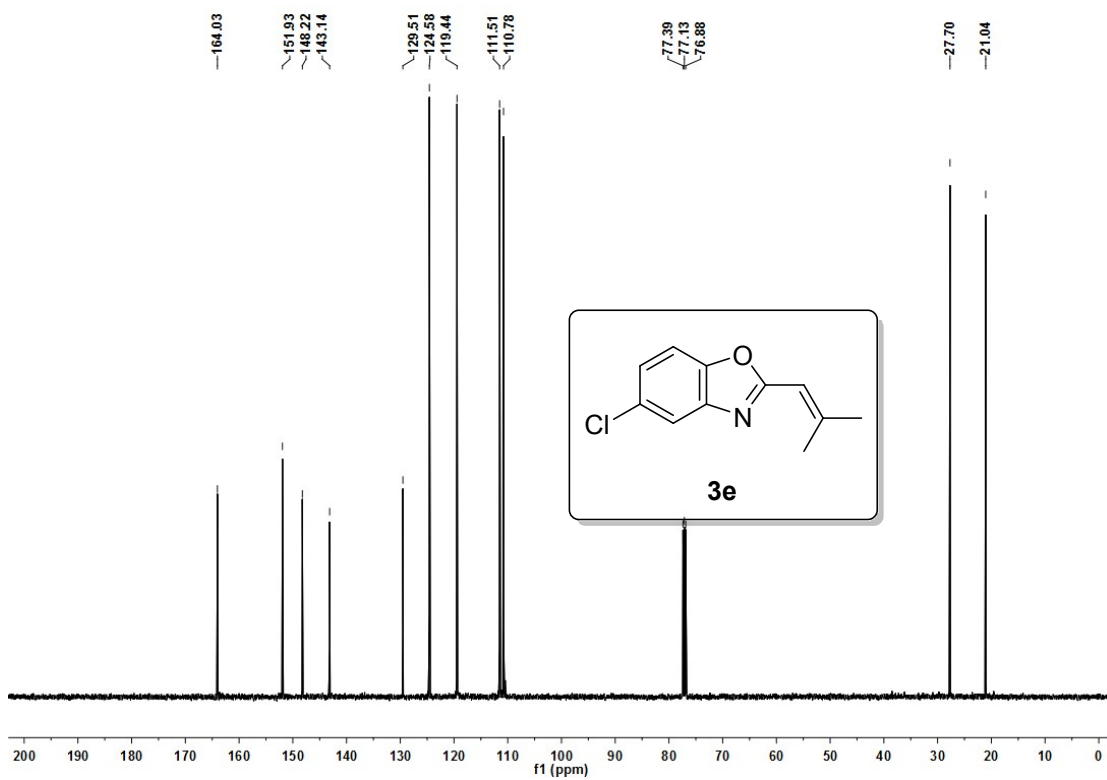



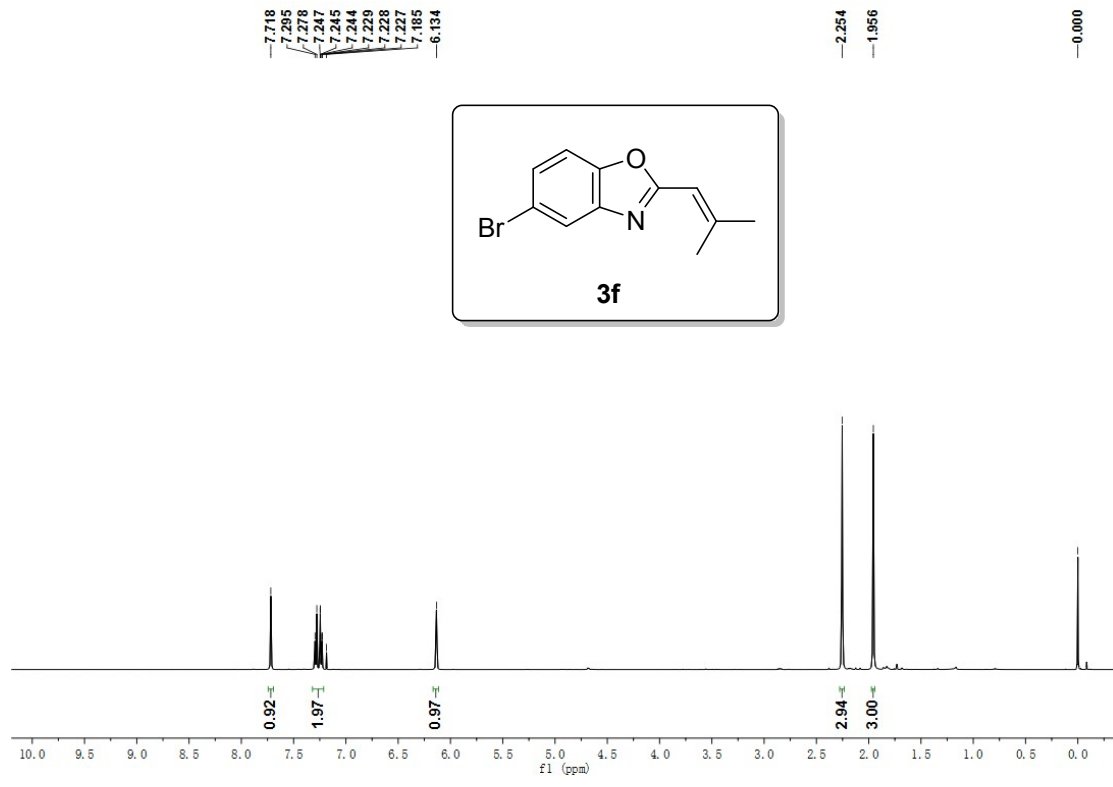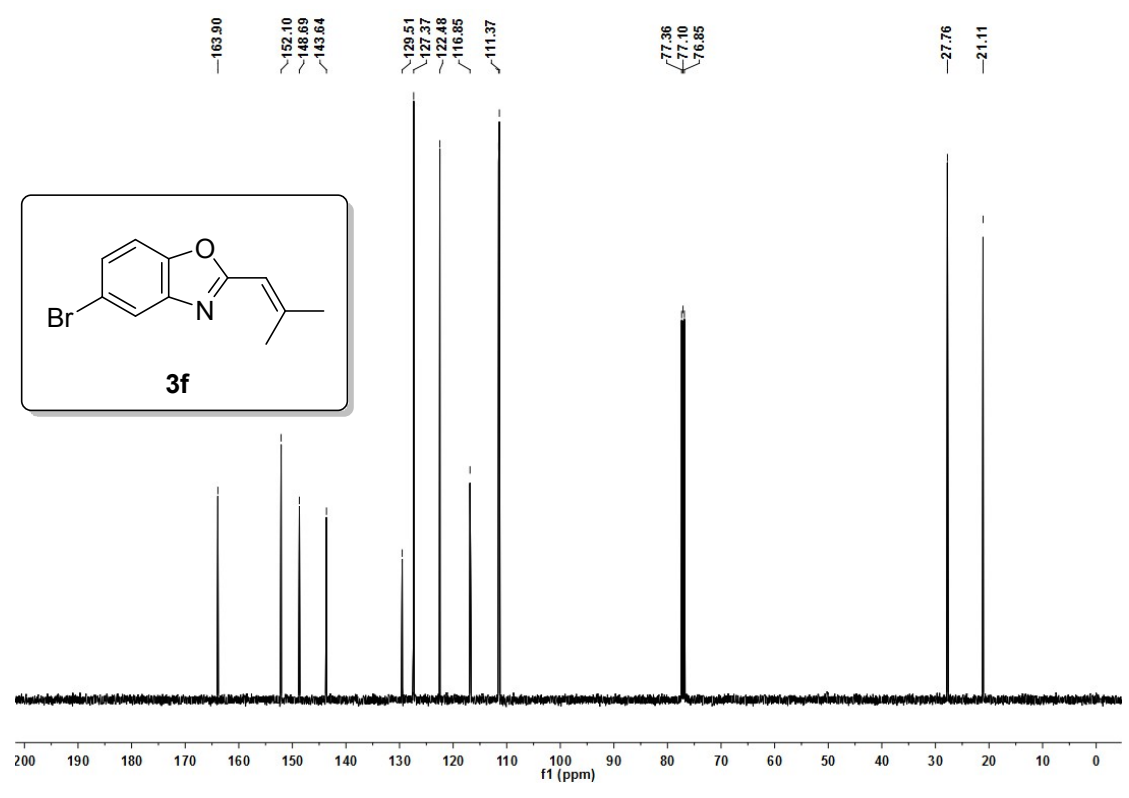

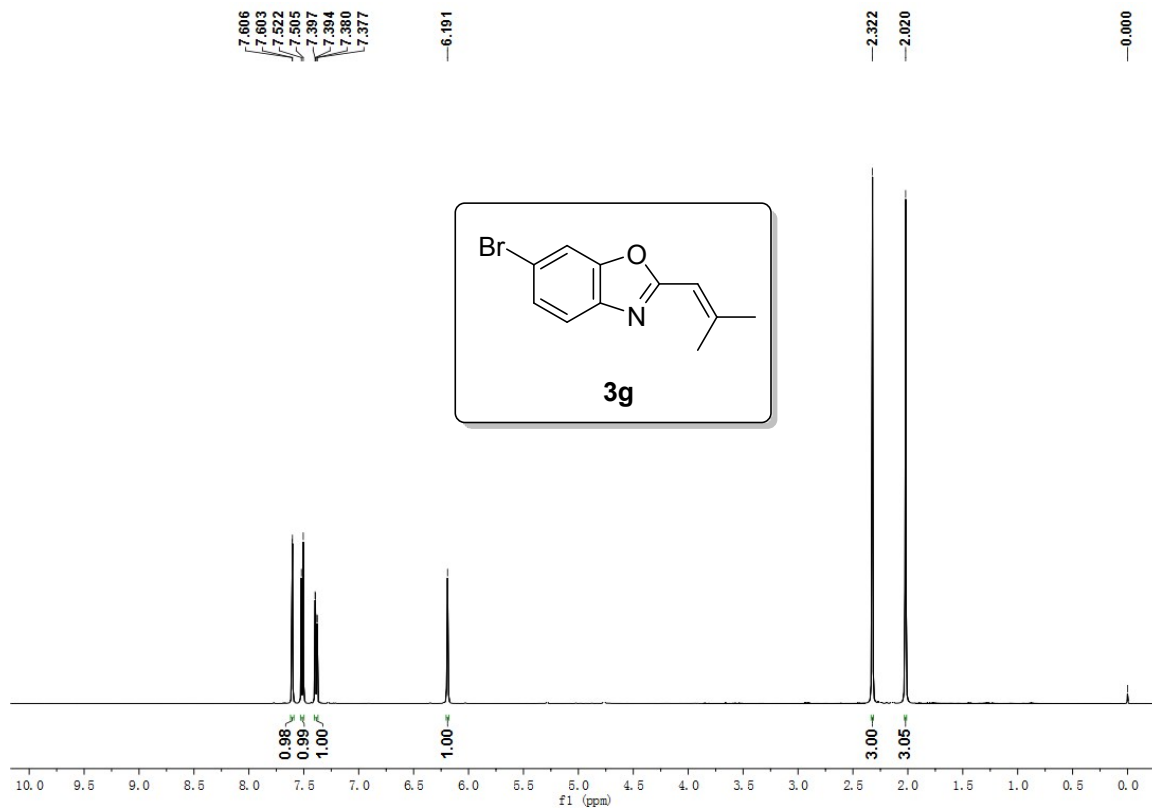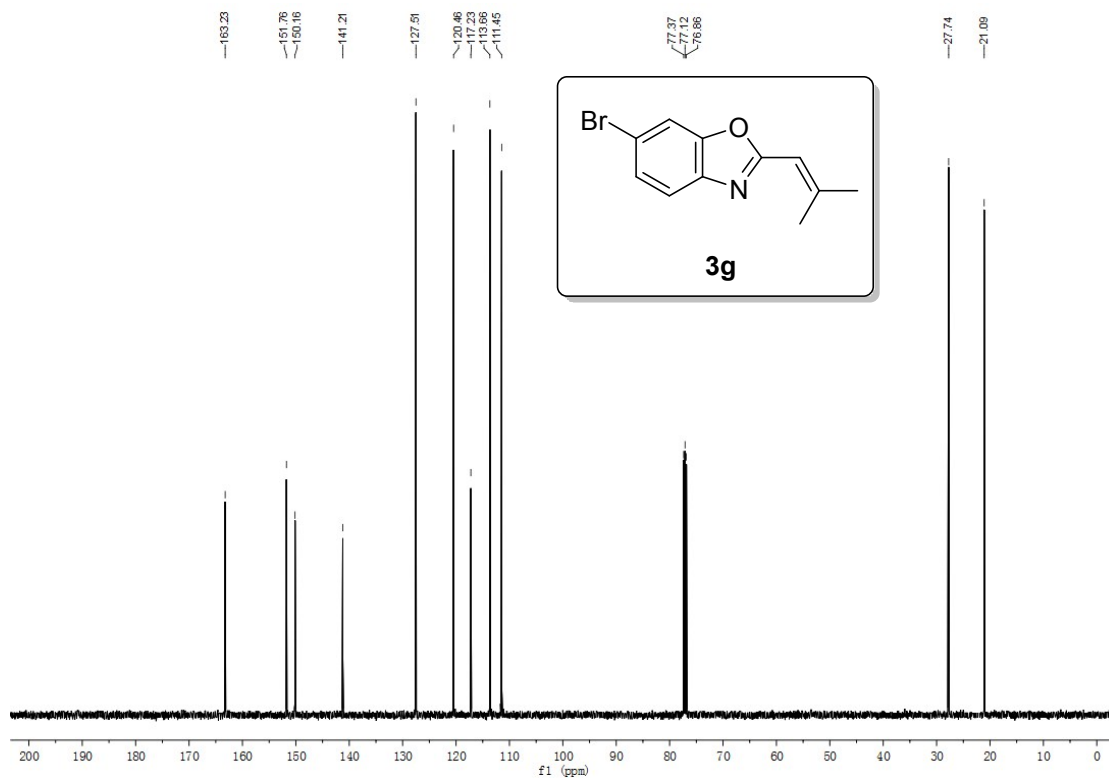

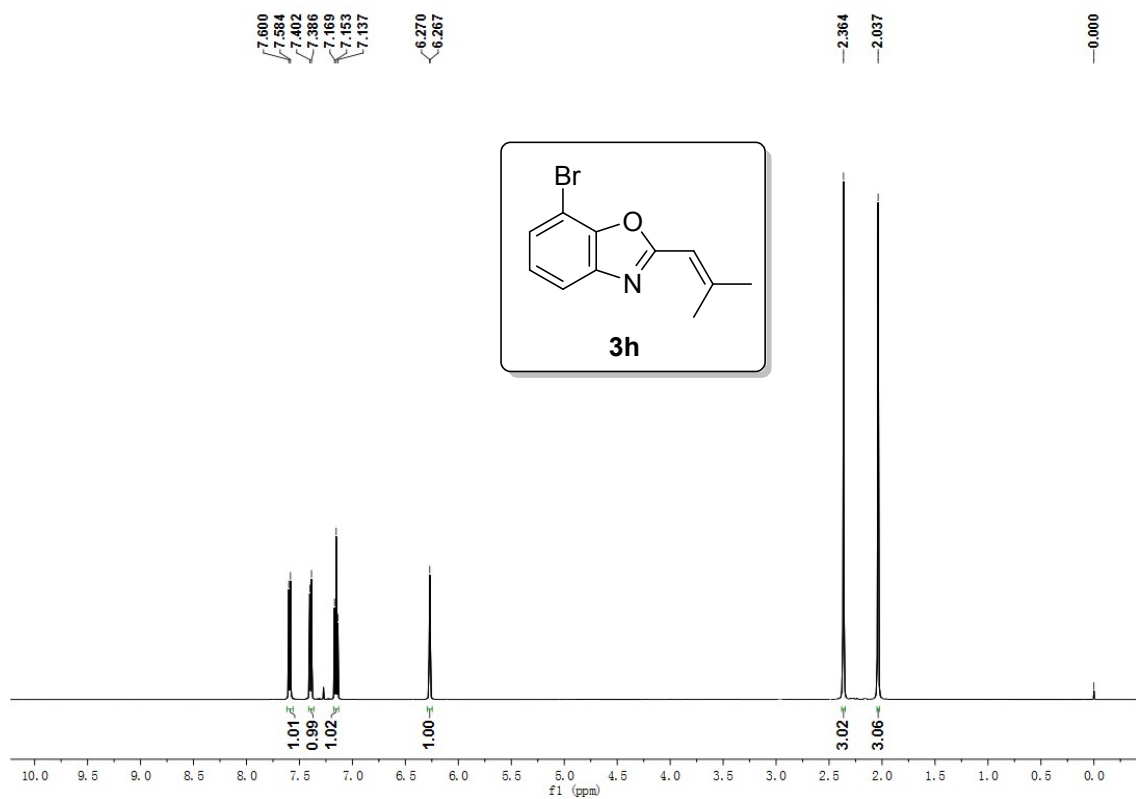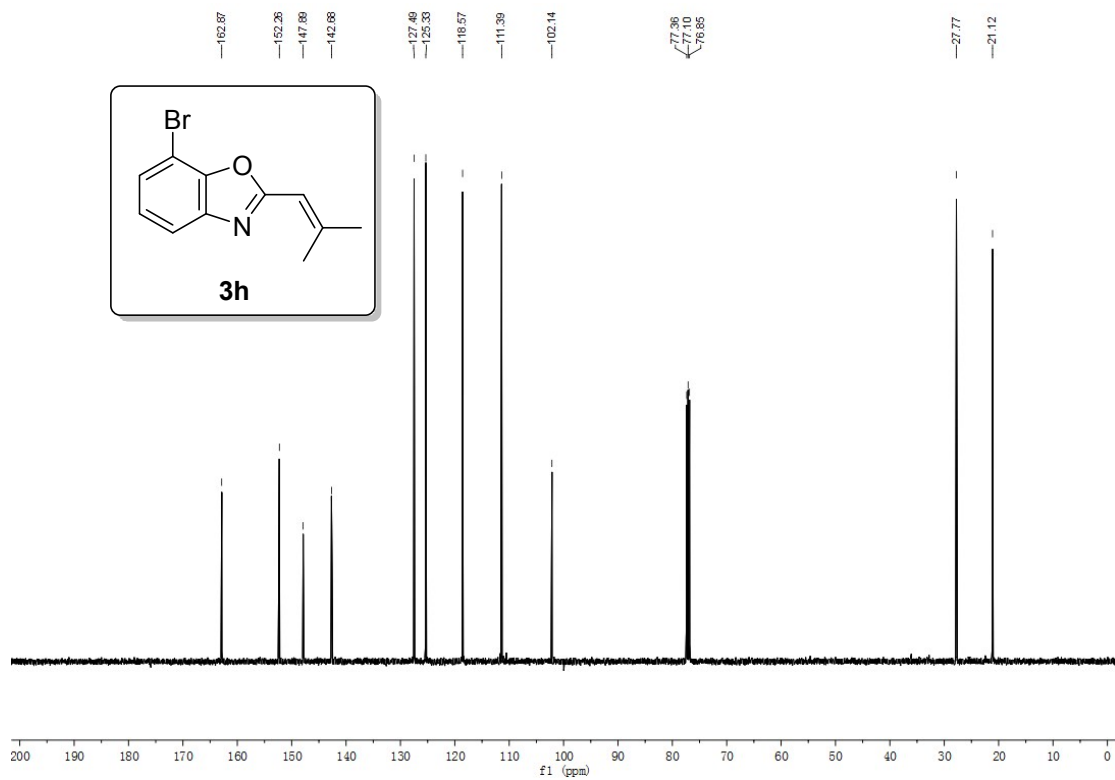

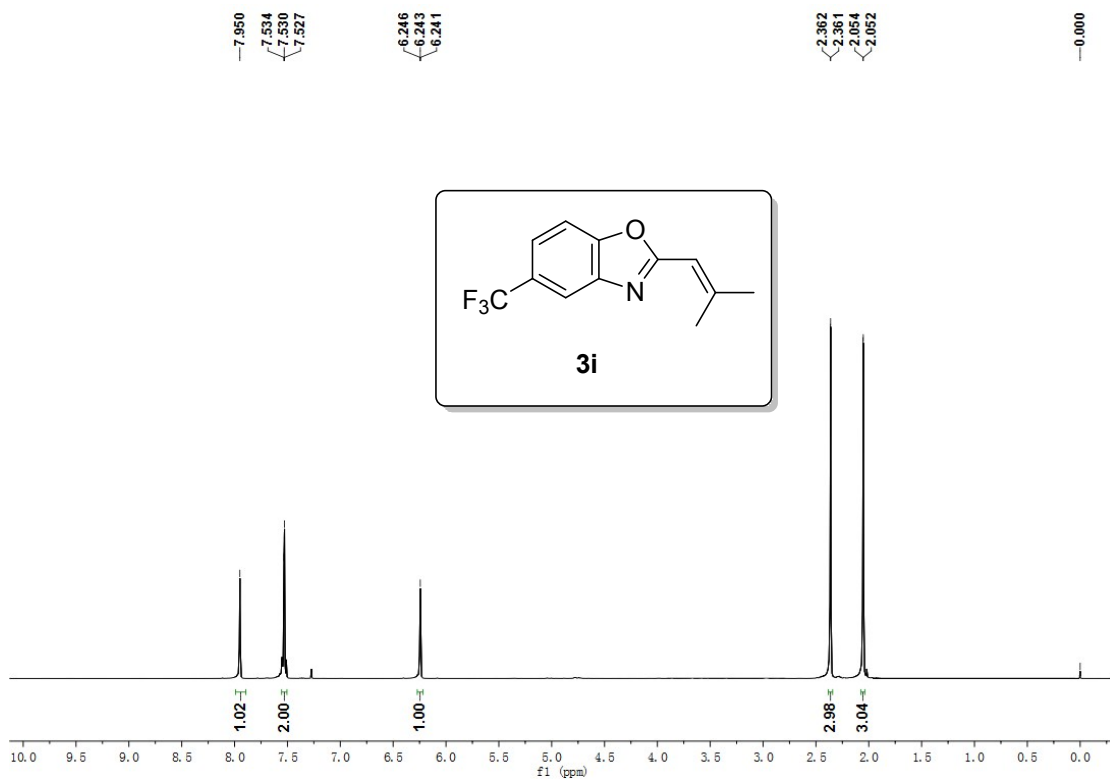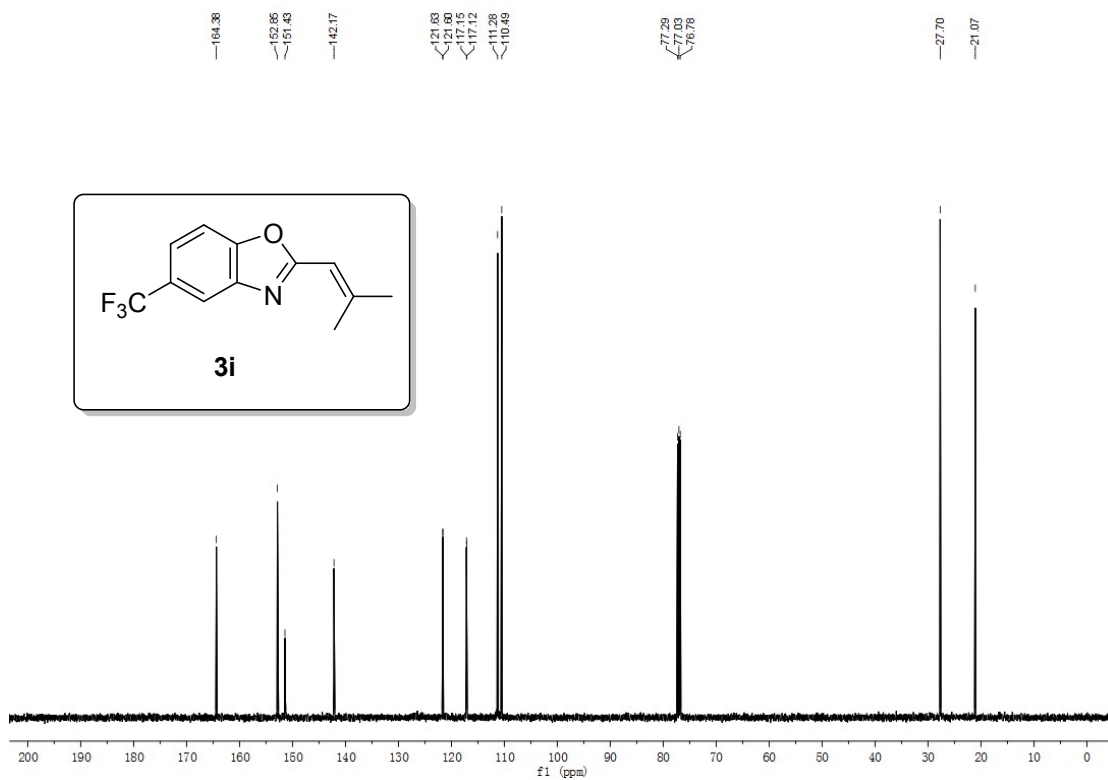

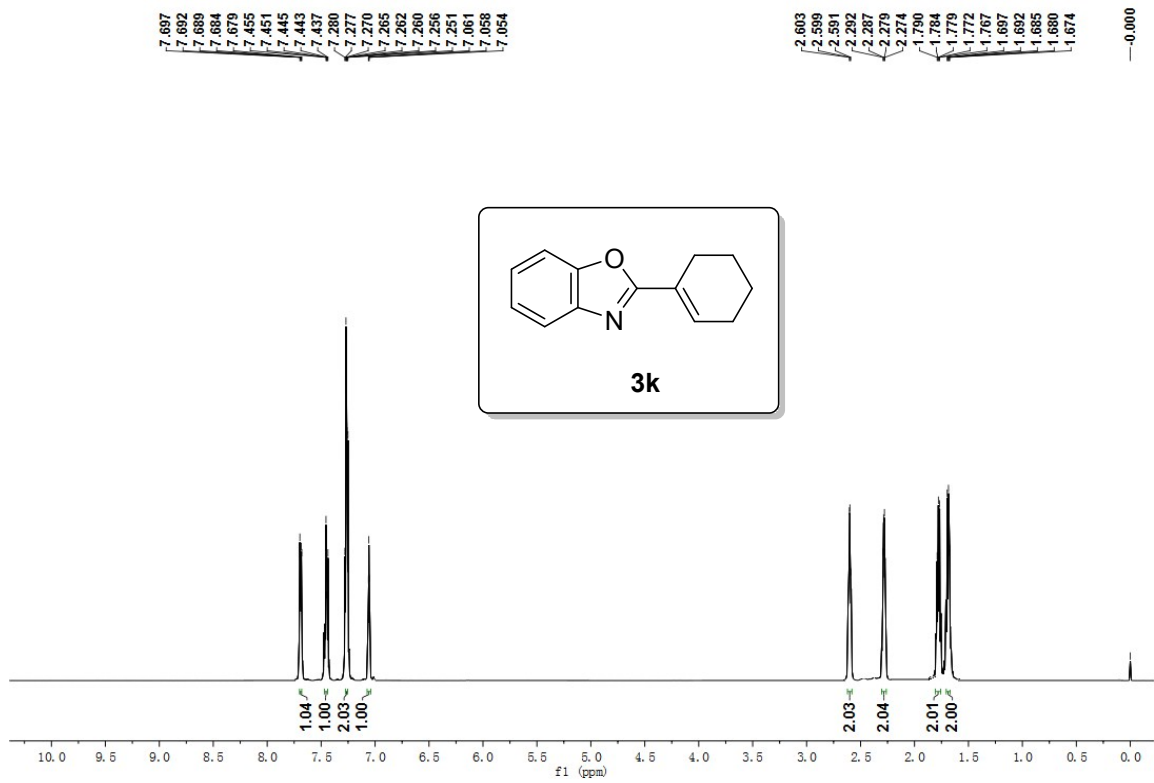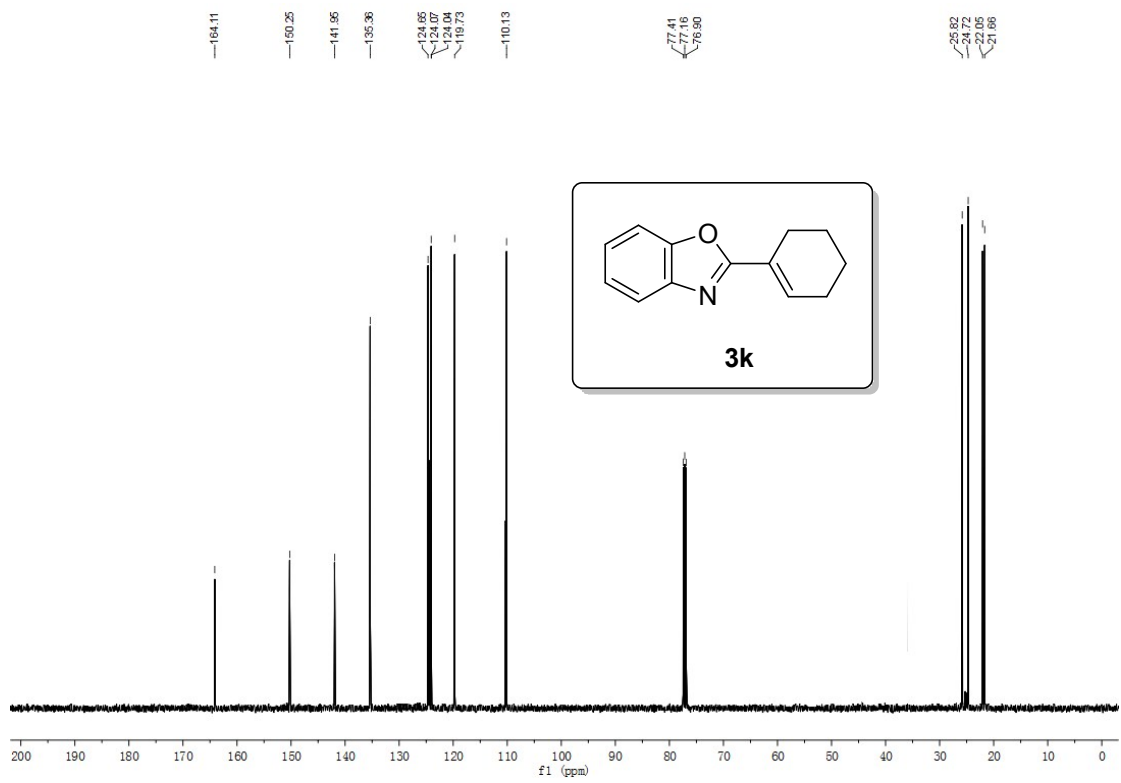

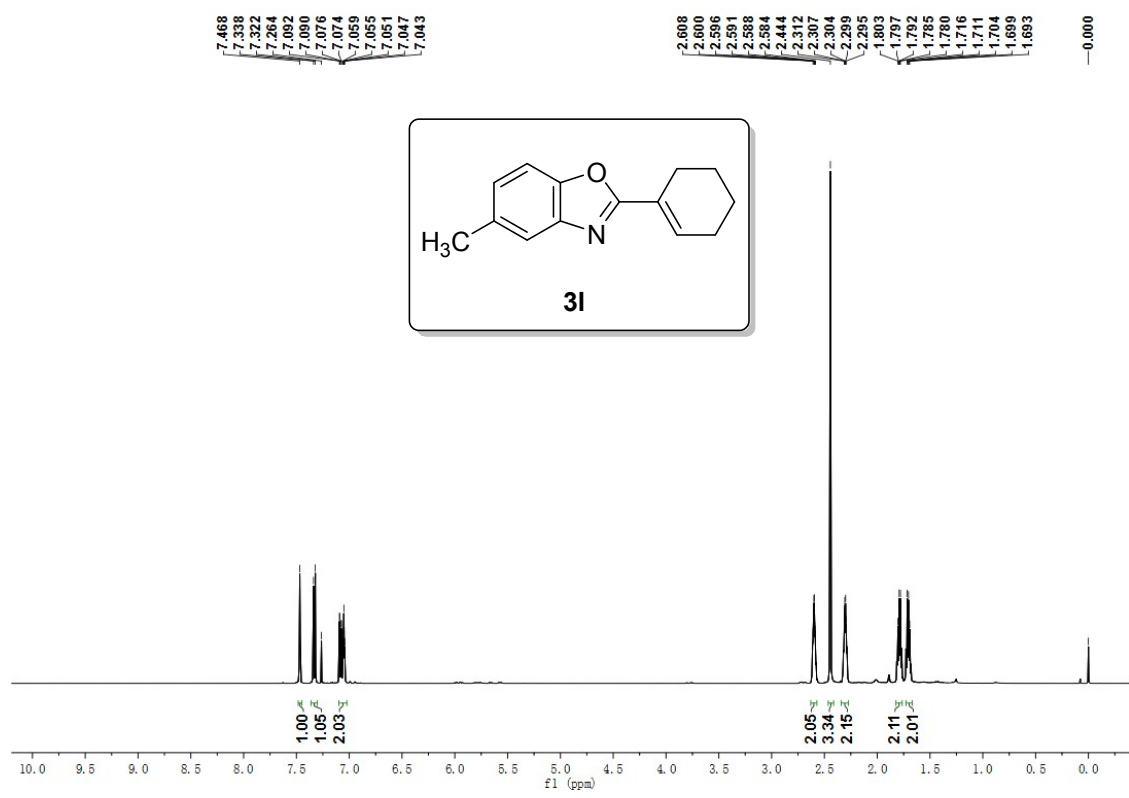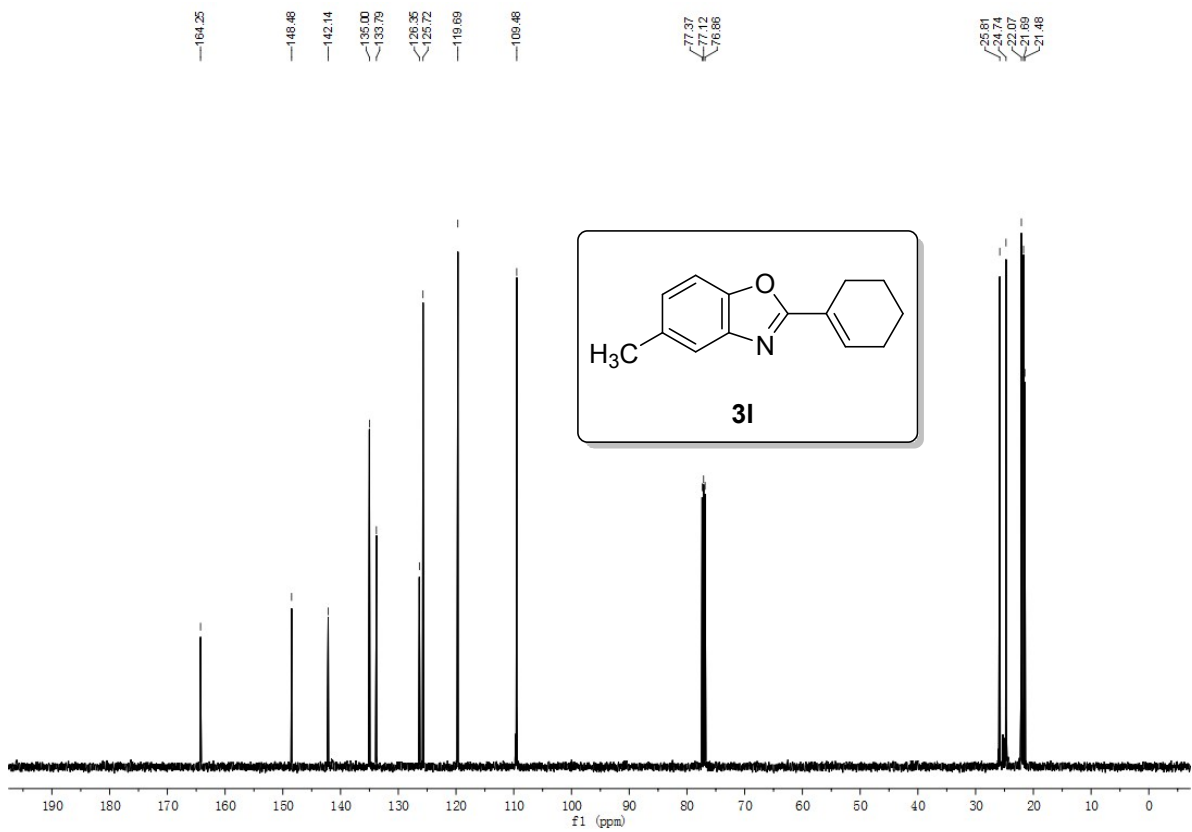

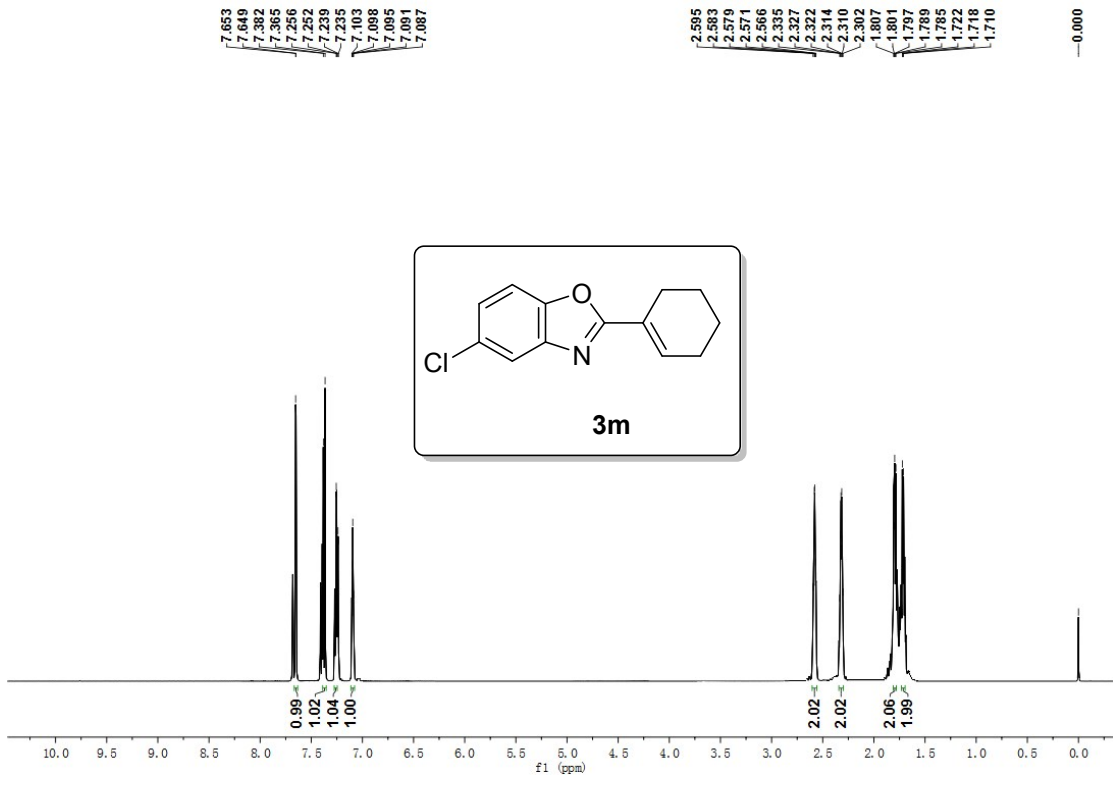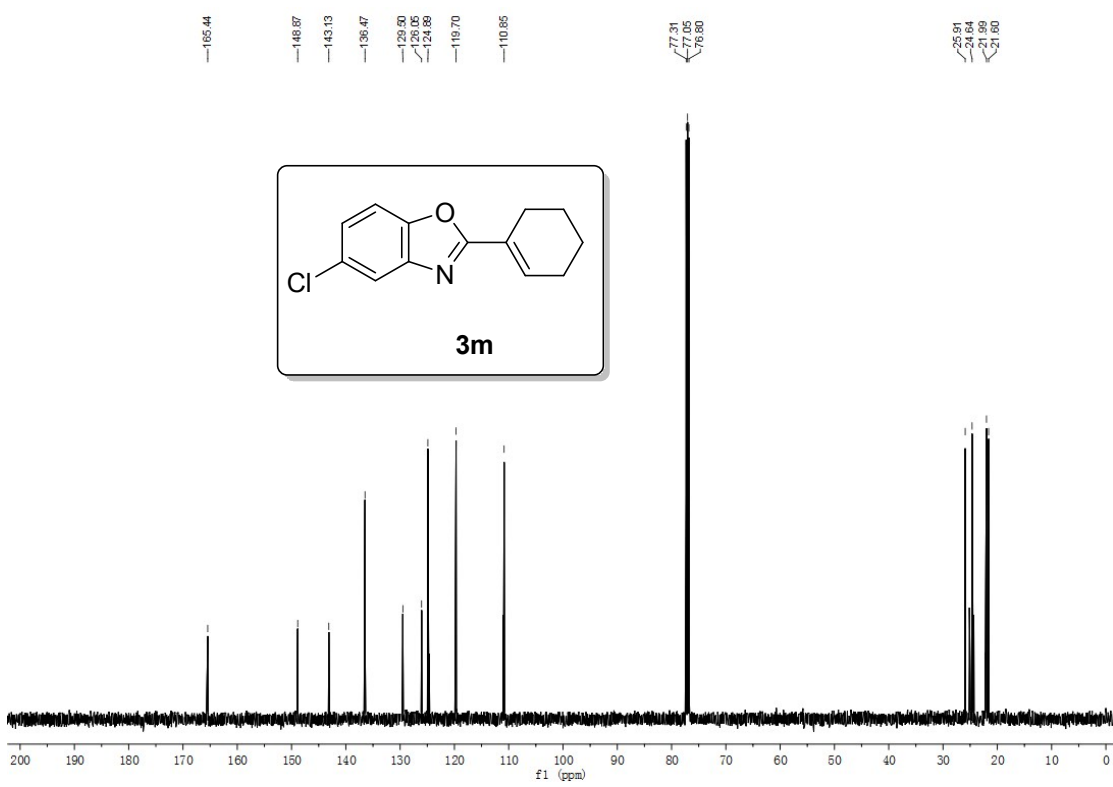

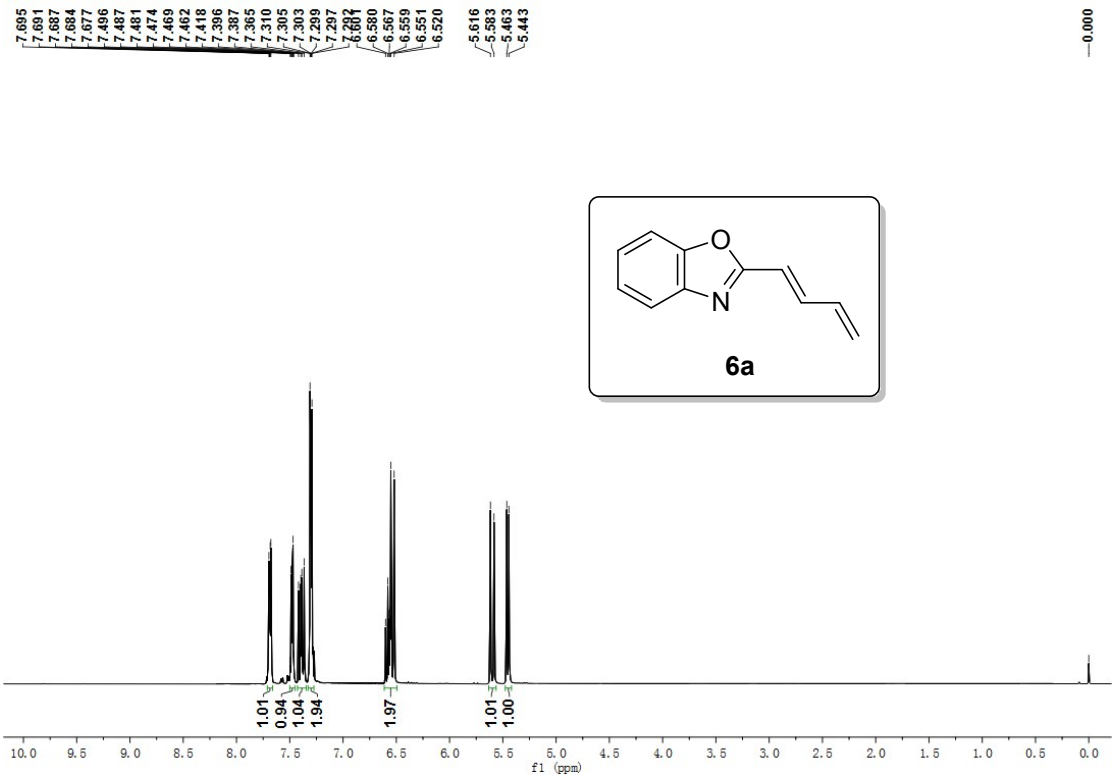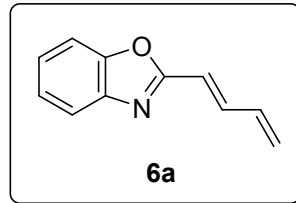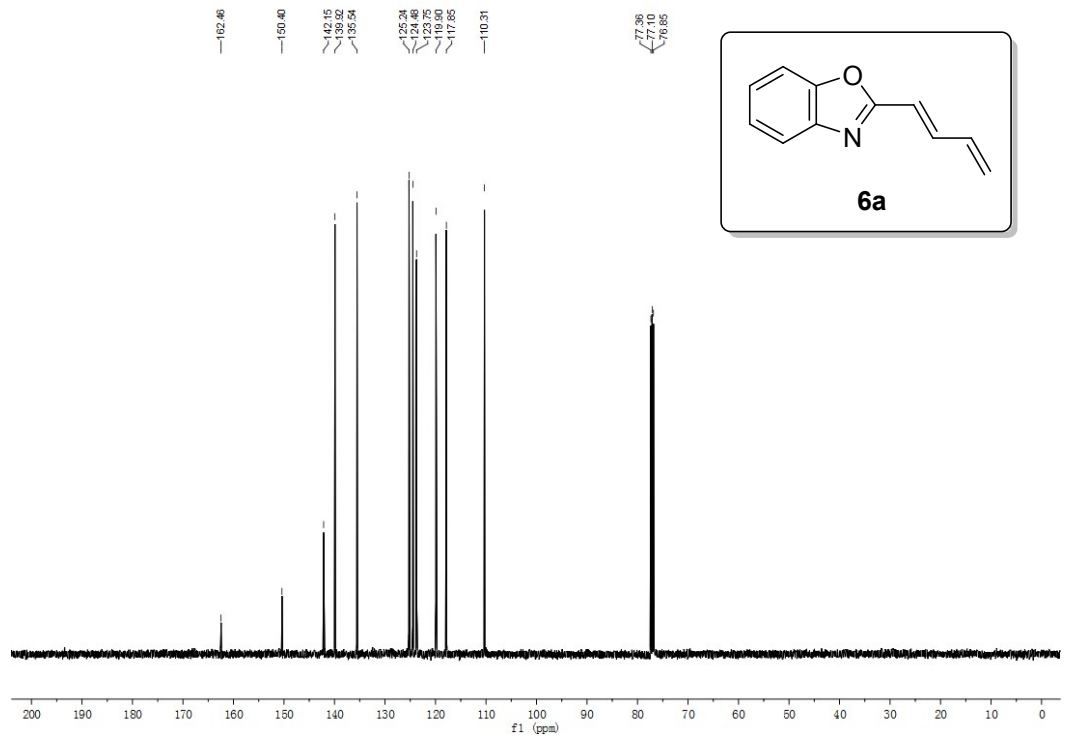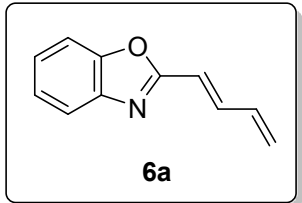



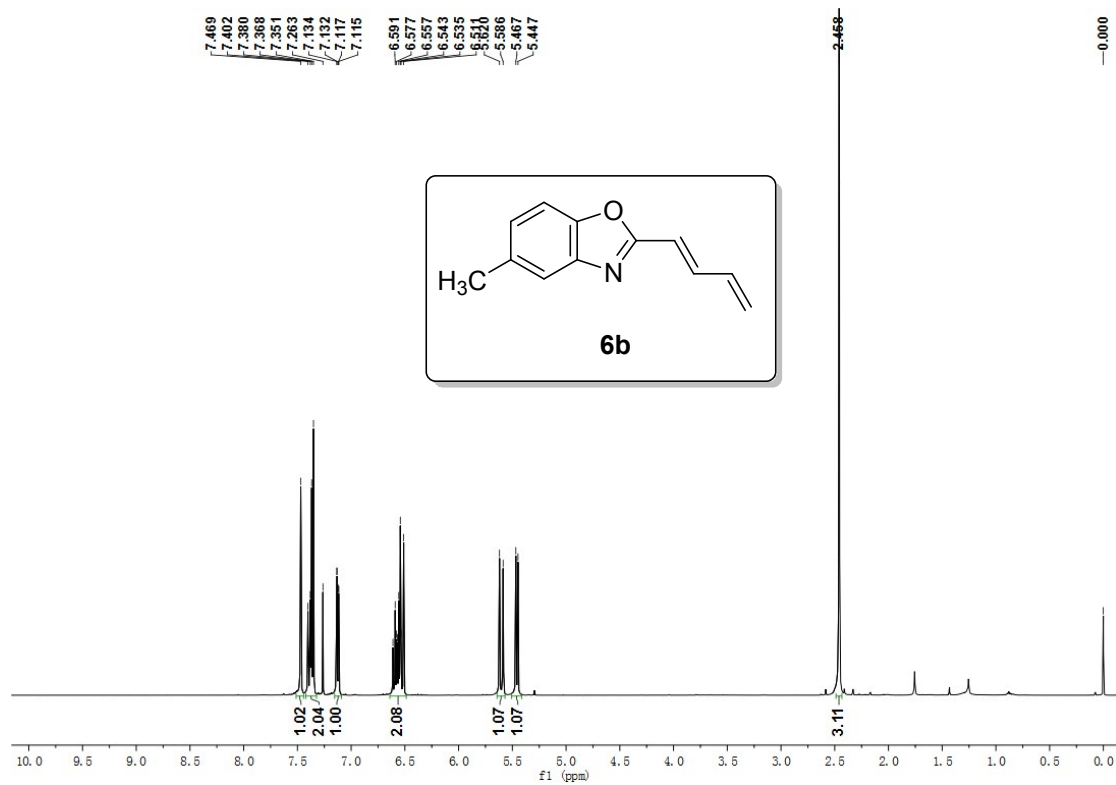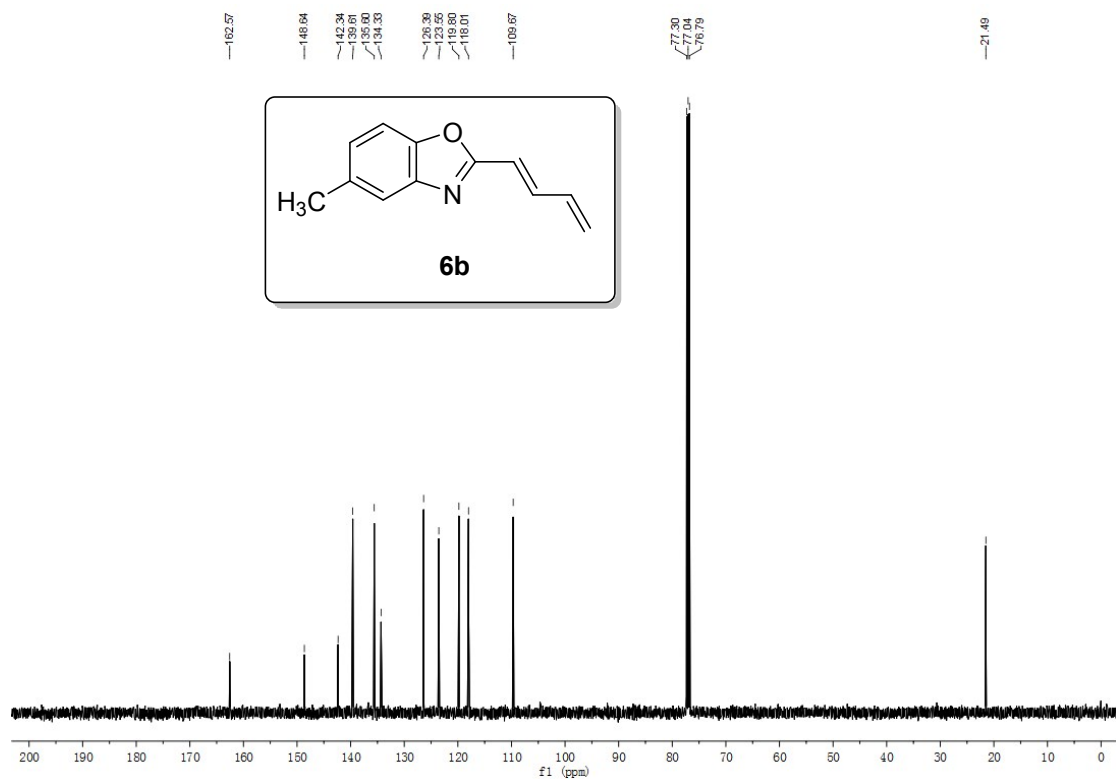

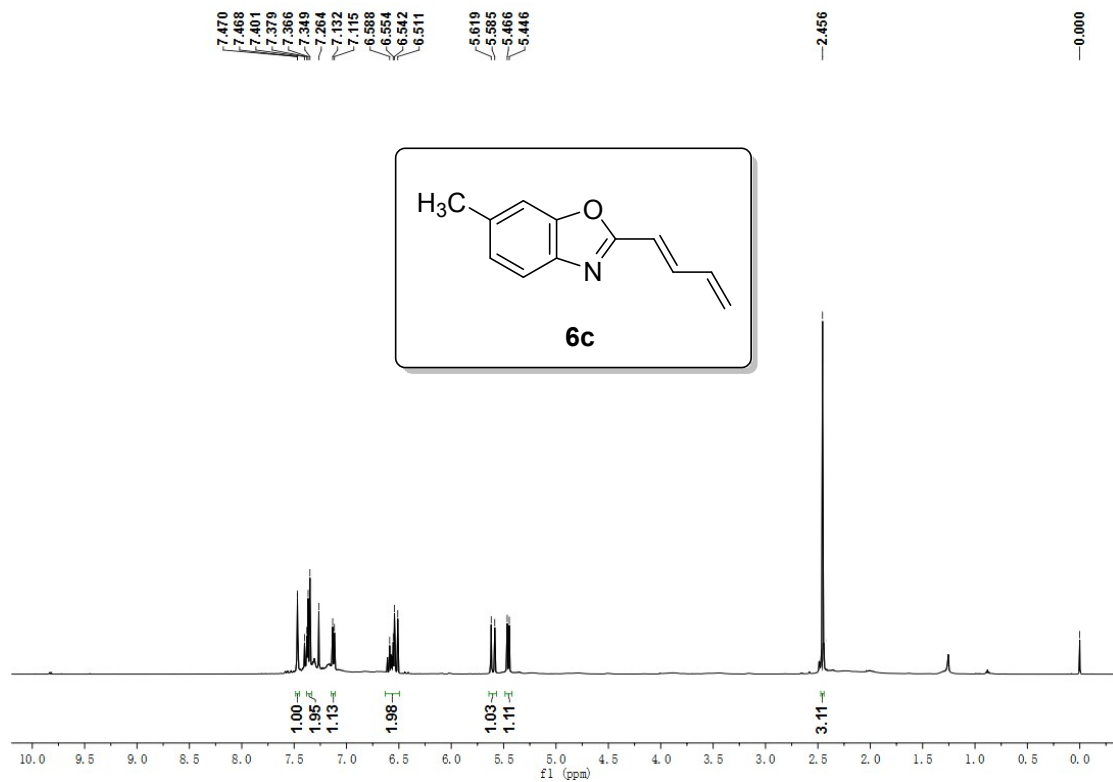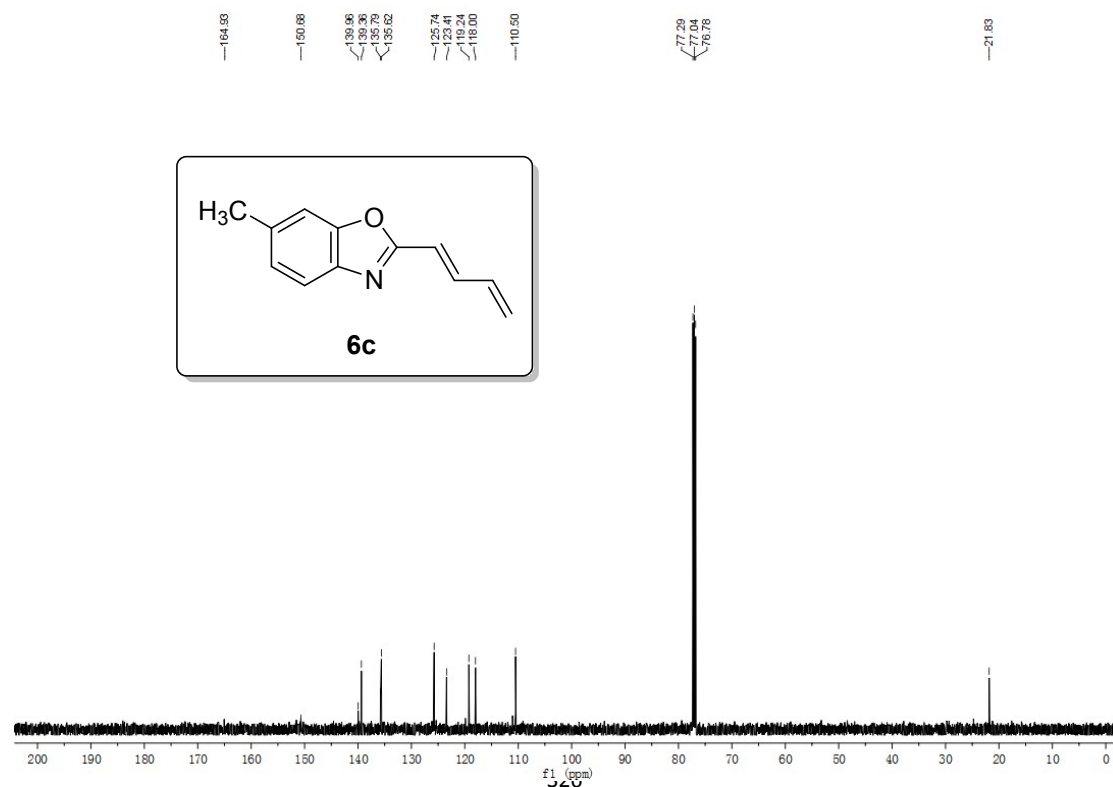

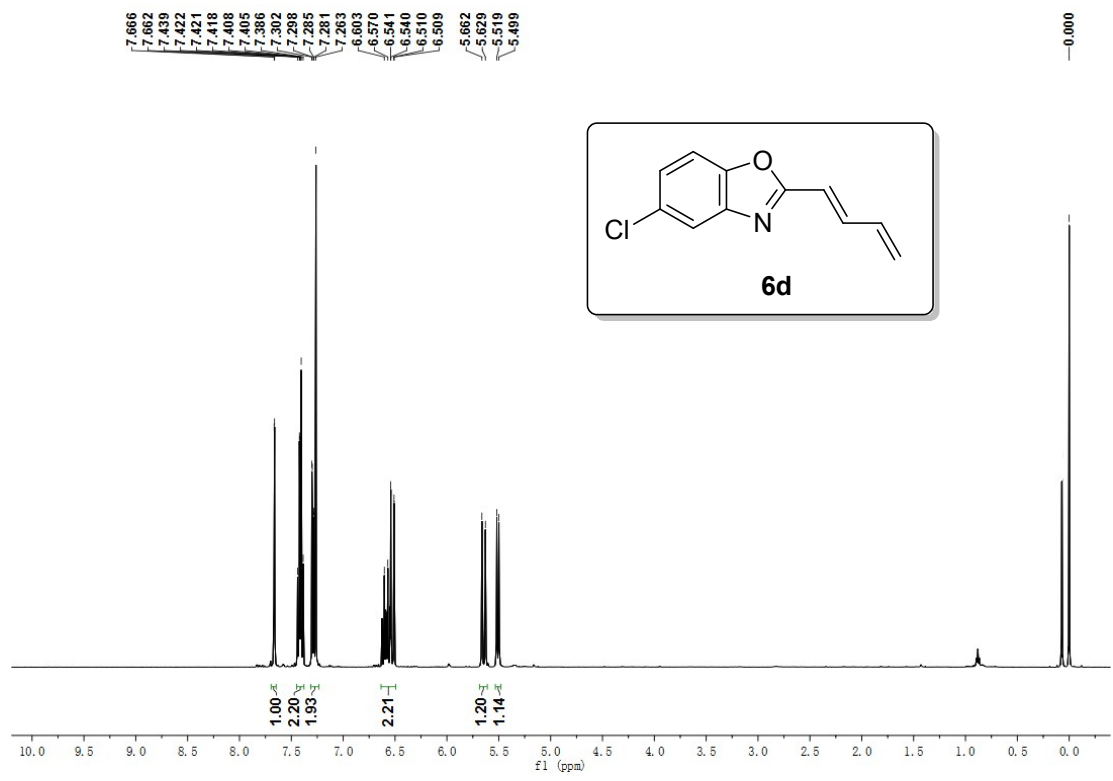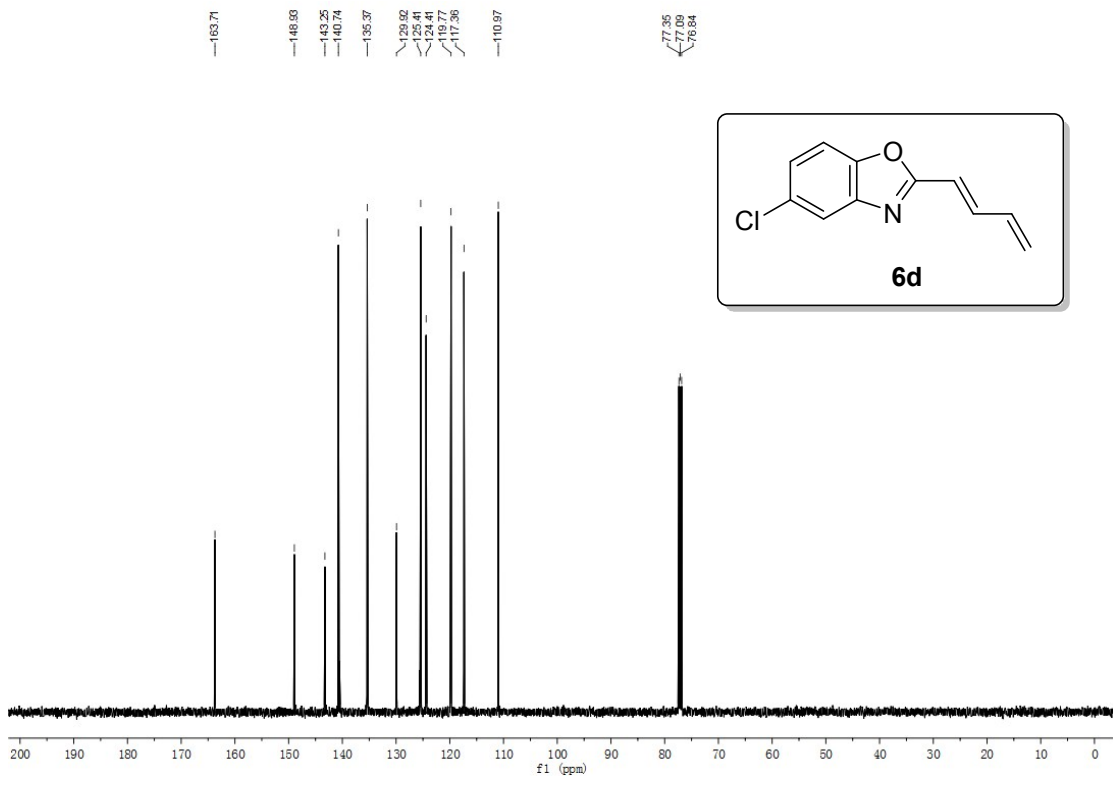

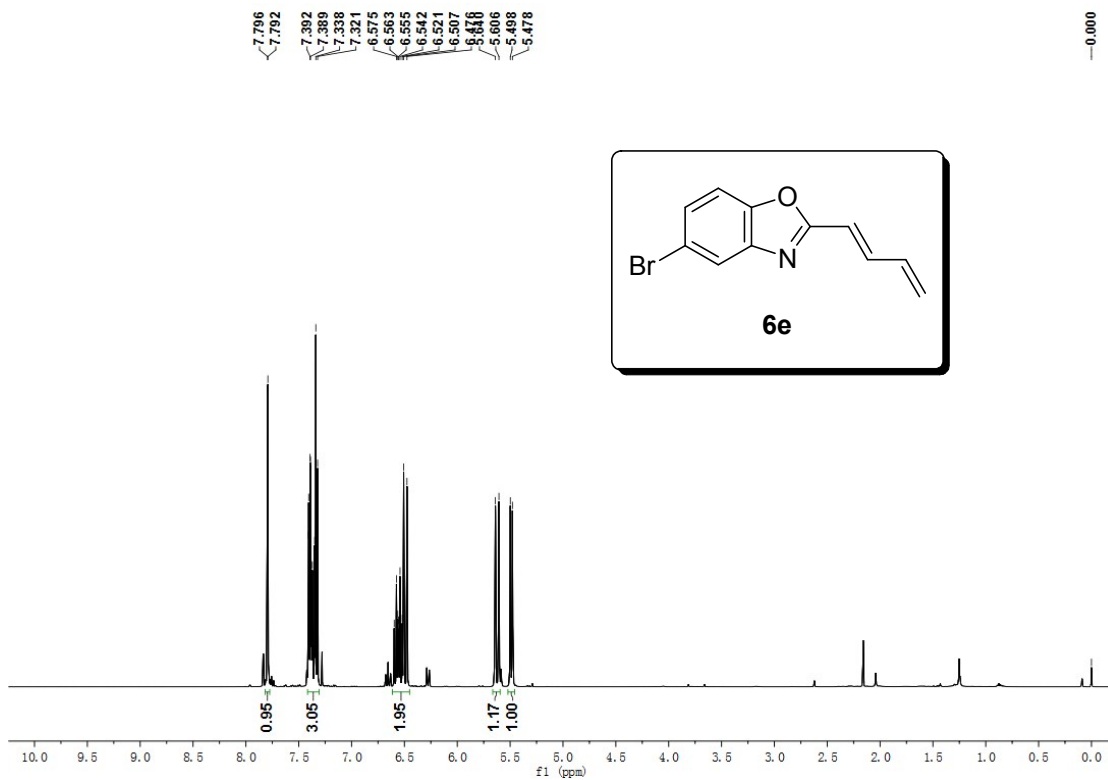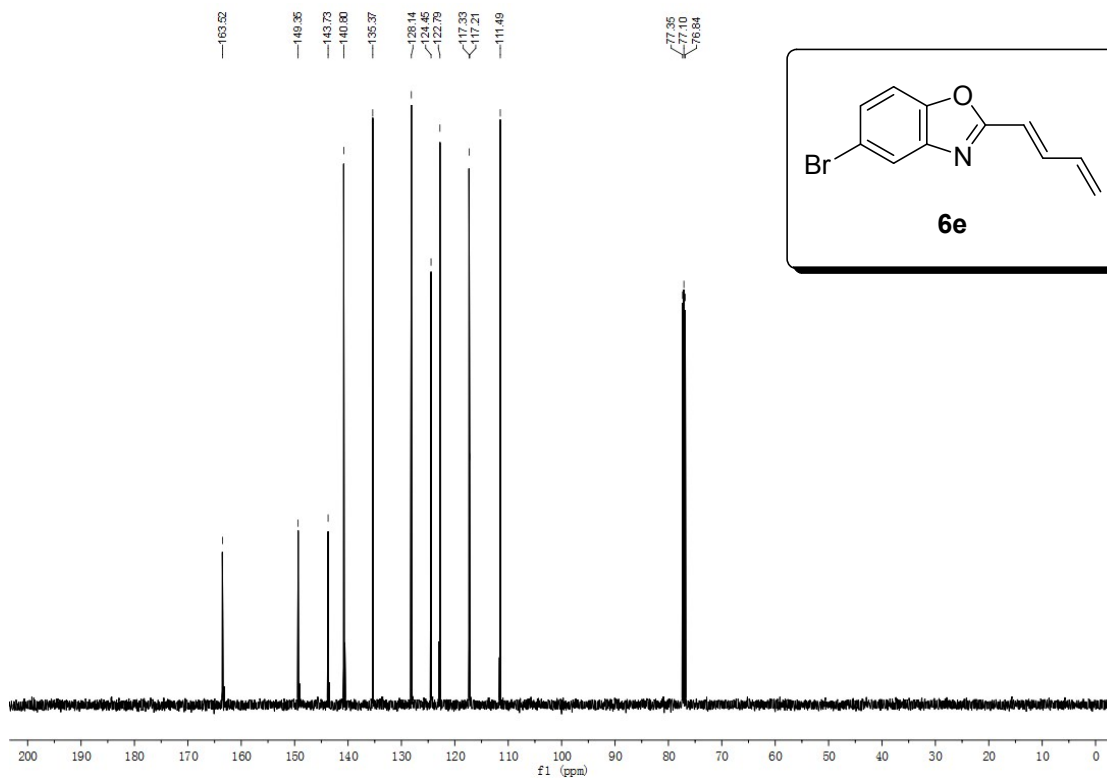

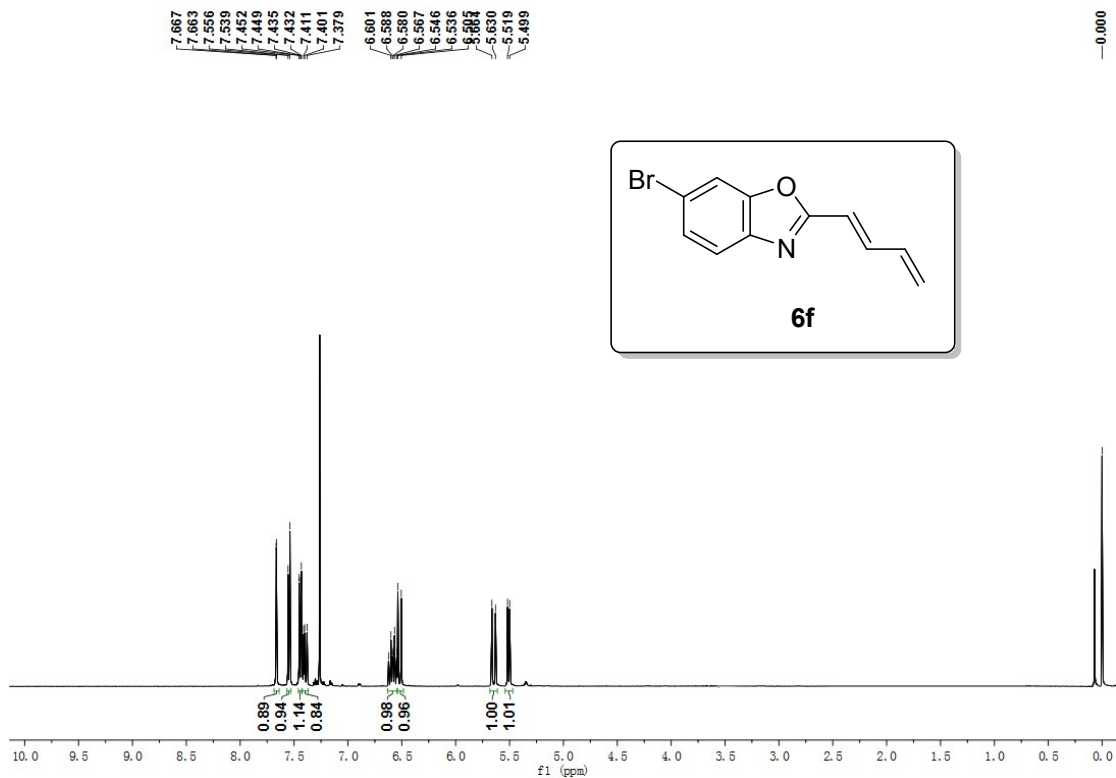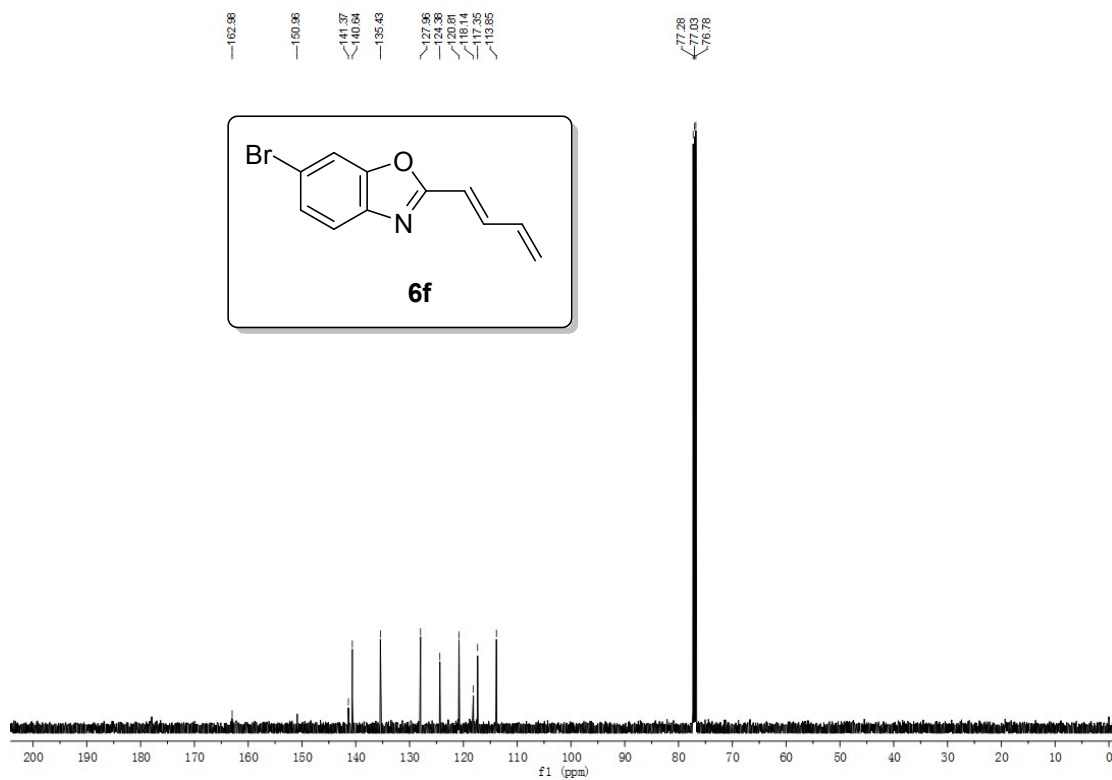

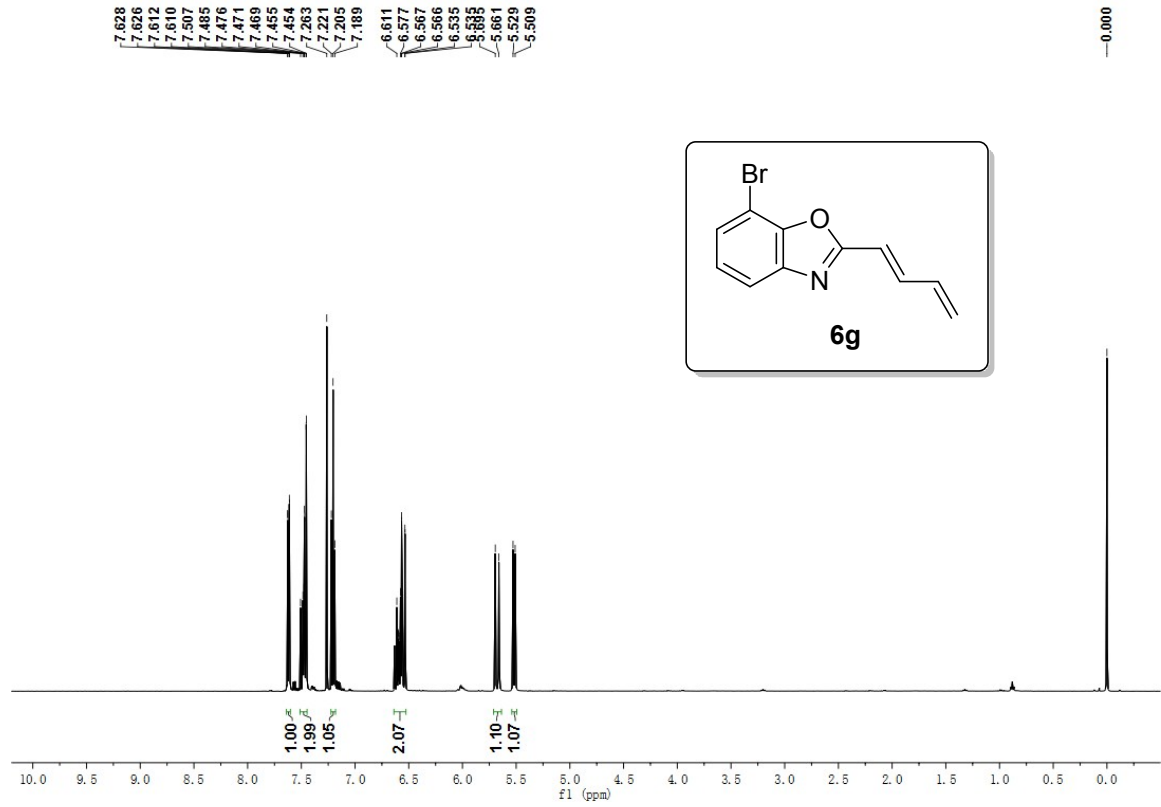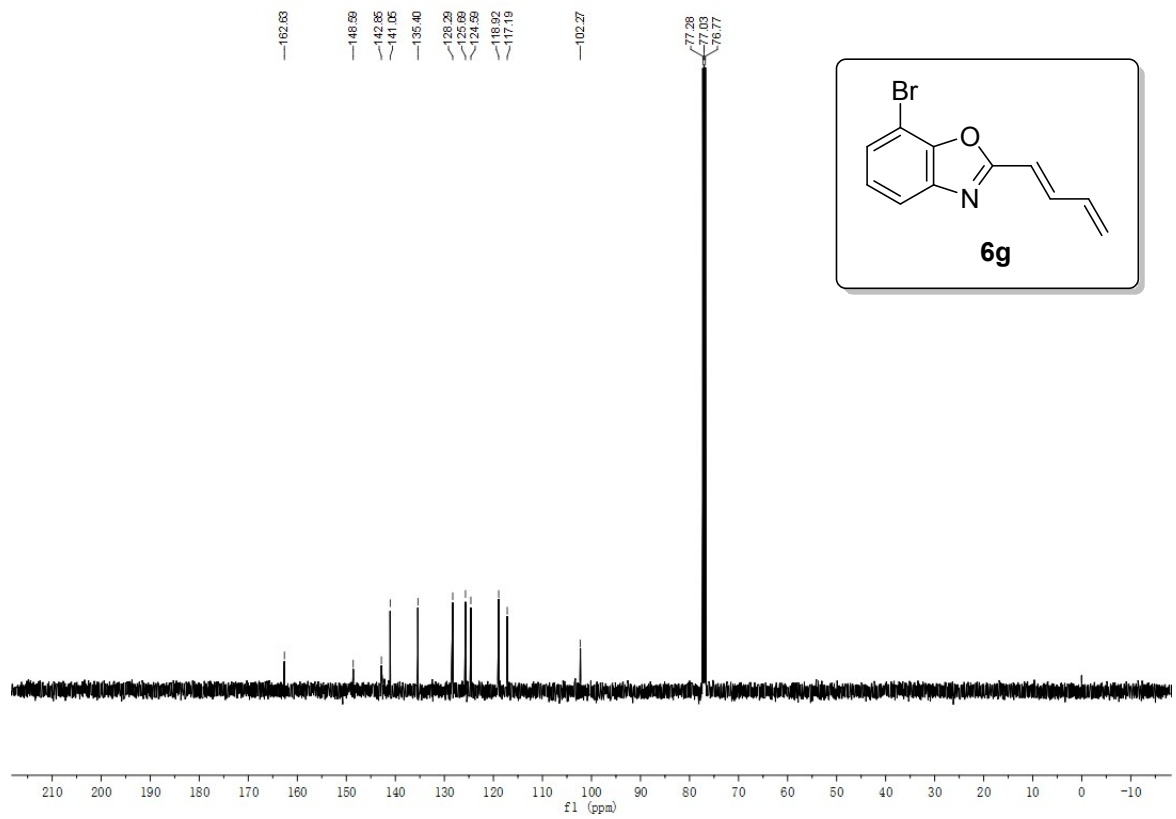

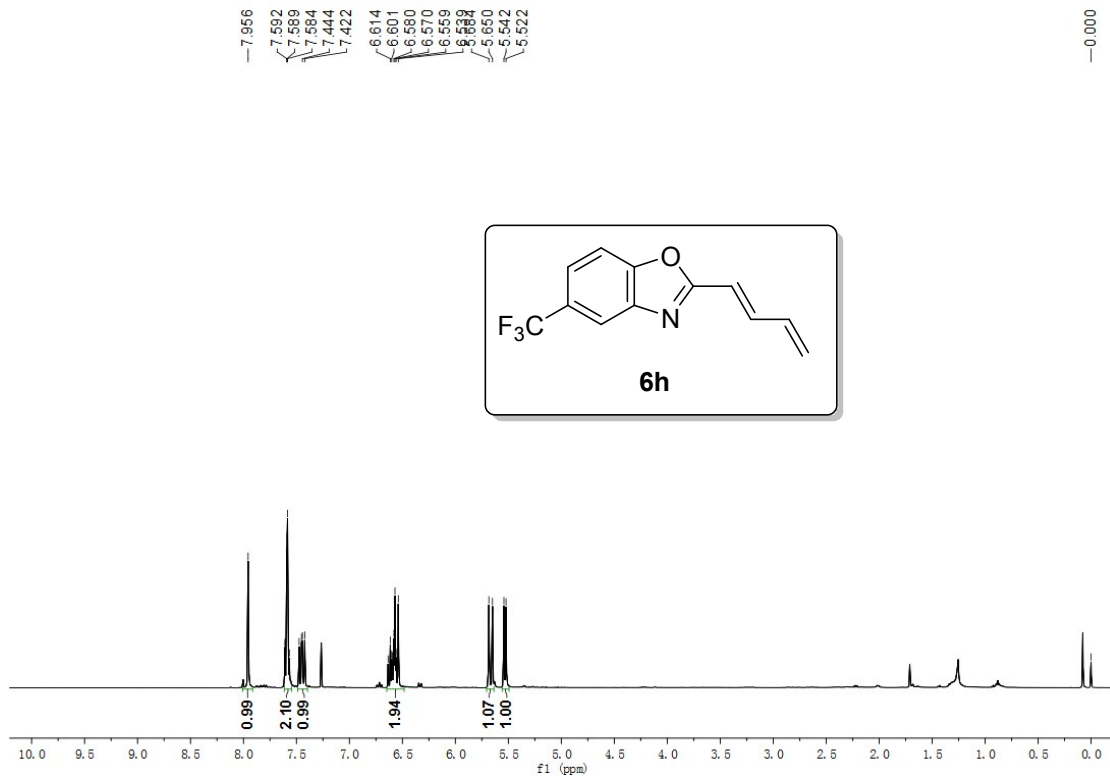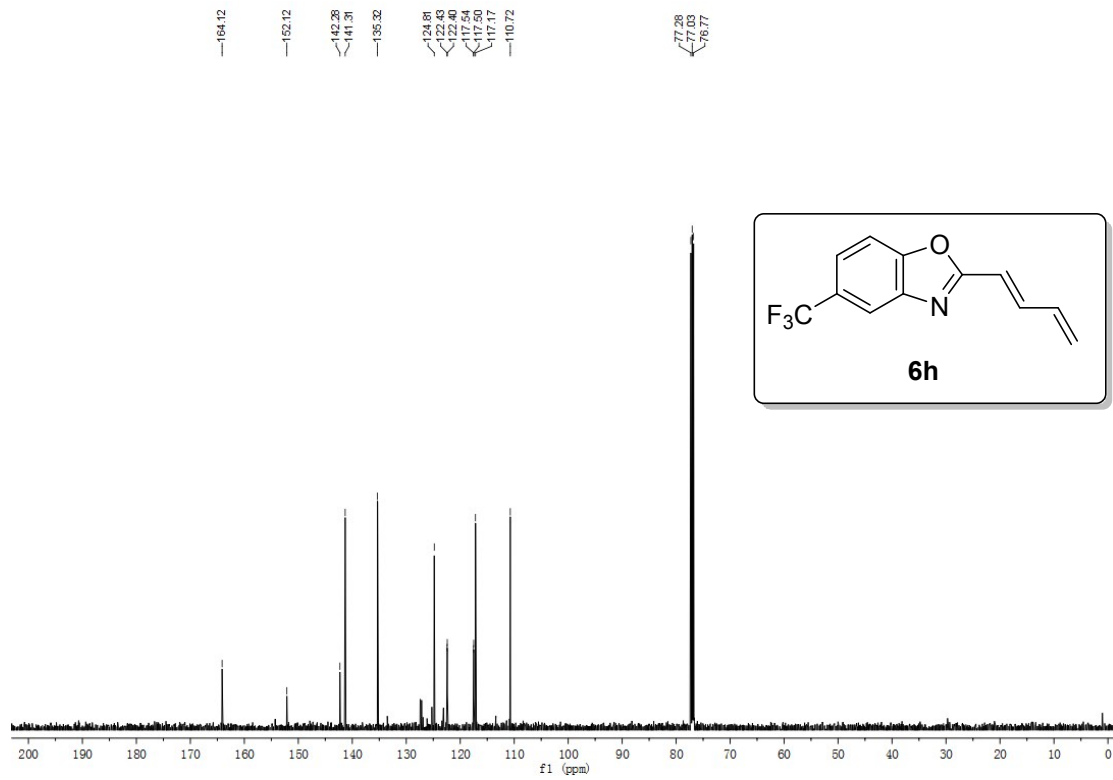

Supplement: c7ob01838j1.pdf [file c7ob01838j1.pdf]
